# Supplementary material for: The Fascinating Flexibility and Coordination Modes of a Pentamethylene Connected Macrocyclic CNC Pincer Ligand
Source: MDPI journal article supplement (doi:10.3390/molecules26061669), 2021-03-17
Supplement: s1 [file s1]

---

## Supporting Information

# The fascinating flexibility and coordination modes of a pentamethylene connected macrocyclic CNC pincer ligand

Ronja Jordan <sup>1</sup>, and Doris Kunz <sup>1,\*</sup>

<sup>1</sup> Eberhard Karls Universität Tübingen; Doris.Kunz@uni-tuebingen.de

\* Correspondence: Doris.Kunz@uni-tuebingen.de; +49-7071-29-72063

## Table of Contents

|          |                                                  |           |
|----------|--------------------------------------------------|-----------|
| <b>1</b> | <b>NMR-Spectroscopy .....</b>                    | <b>2</b>  |
| <b>2</b> | <b>HR-MS Spectrum of (6).....</b>                | <b>37</b> |
| <b>3</b> | <b>Crystal structure analysis.....</b>           | <b>38</b> |
| <b>4</b> | <b>UV-Vis and Fluorescence Spectroscopy.....</b> | <b>39</b> |

# 1 NMR-Spectroscopy

## (Hbimca<sup>C5</sup>)·2HPF<sub>6</sub> (1b):

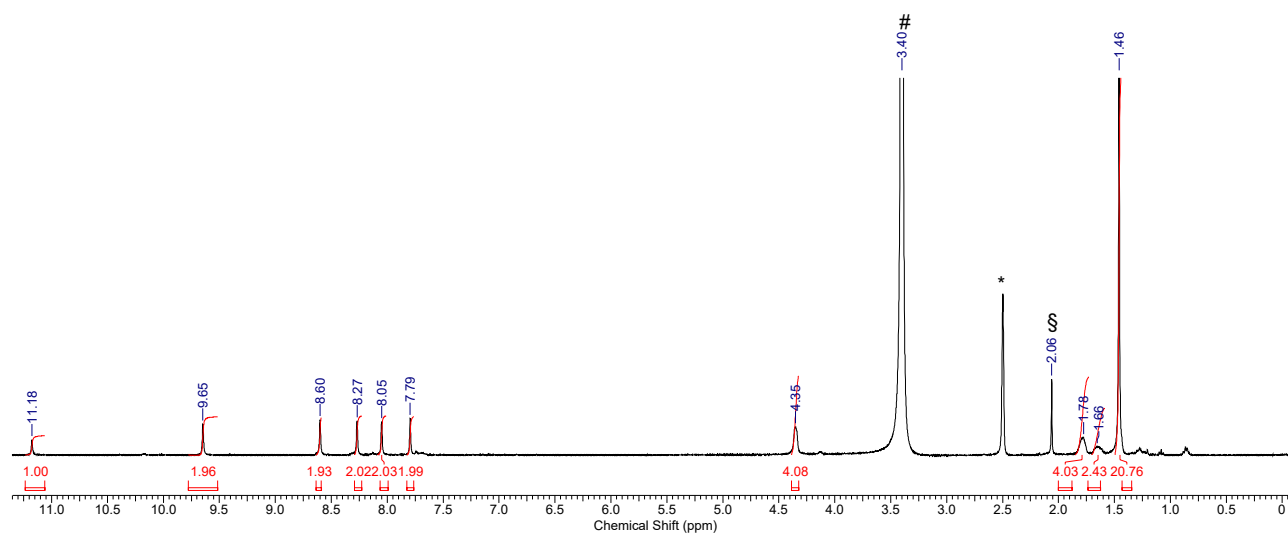

Figure 1: <sup>1</sup>H NMR spectrum (400 MHz, DMSO-d<sub>6</sub> (\*)) of (Hbimca<sup>C5</sup>)·2HPF<sub>6</sub> (1b) (MeCN (δ), water (#)).

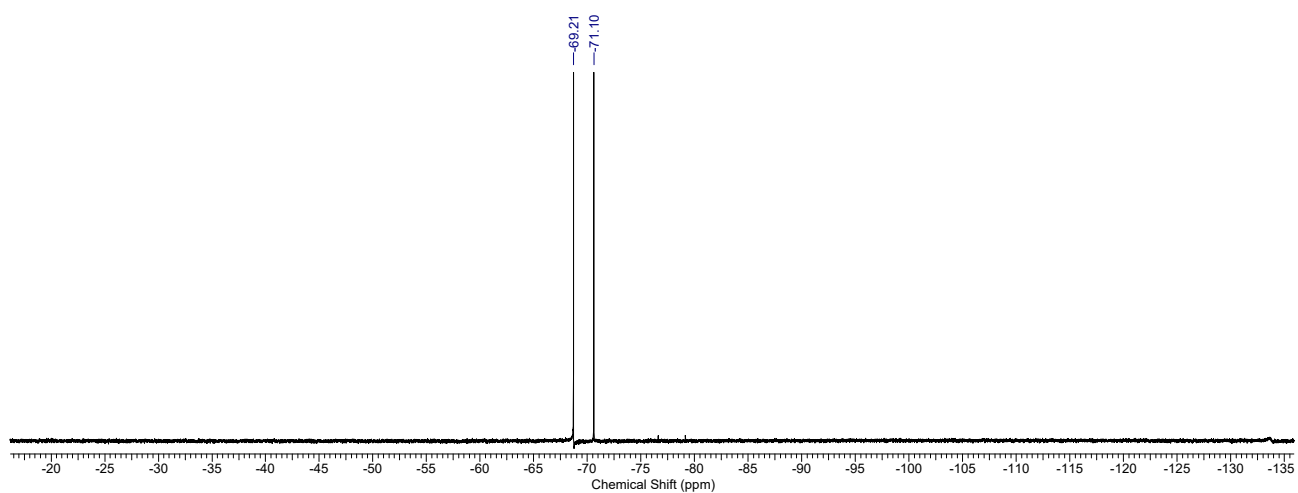

Figure 2: <sup>19</sup>F NMR spectrum (376.48 MHz, DMSO-d<sub>6</sub> (\*)) of (Hbimca<sup>C5</sup>)·2HPF<sub>6</sub> (1b).

**[Li(bimca<sup>C5</sup>)] (2):**

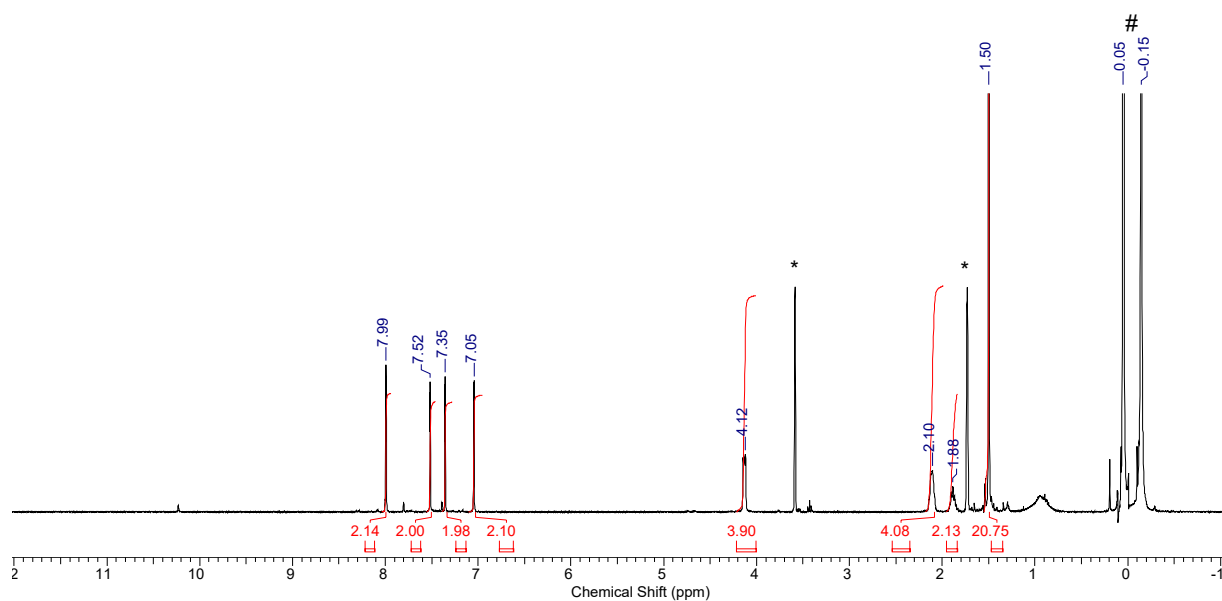

Figure 3: <sup>1</sup>H NMR spectrum (400 MHz, THF-d<sub>8</sub>(\*)) of [Li(bimca<sup>C5</sup>)] (2) generated with LiHMDS (#); HMDS (#).

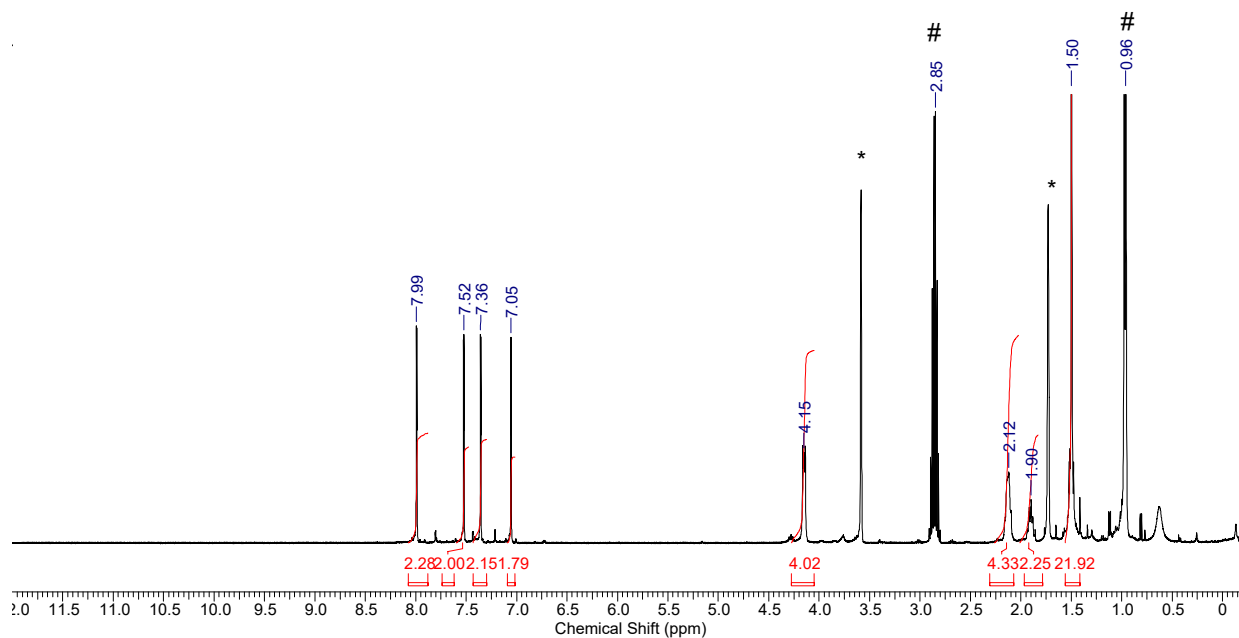

Figure 4: <sup>1</sup>H NMR spectrum (400 MHz, THF-d<sub>8</sub>(\*)) of [Li(bimca<sup>C5</sup>)] (2); generated with LDA (#); HDA(#).

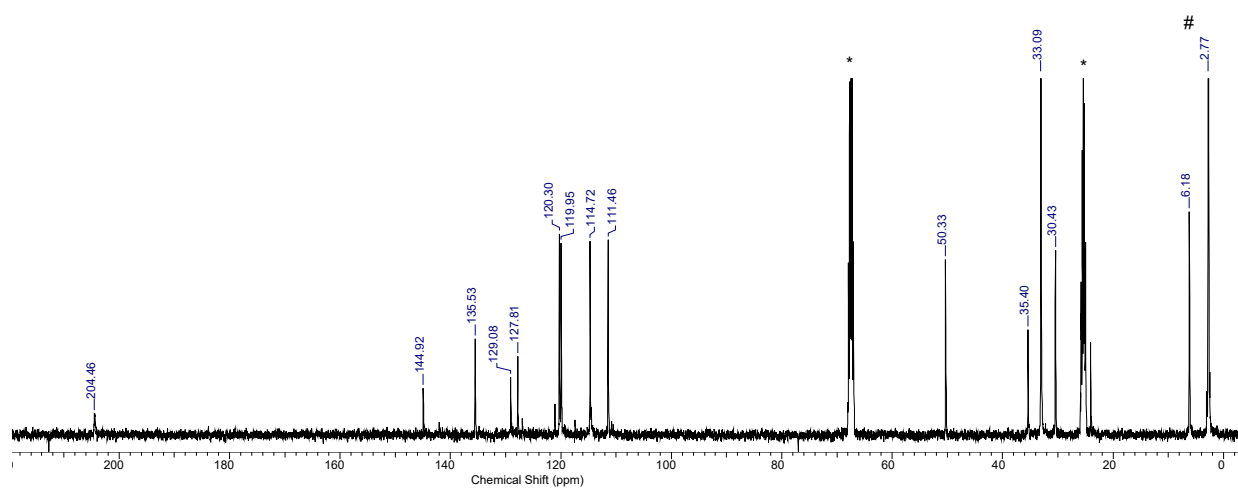

Figure 5:  $^{13}\text{C}$  NMR spectrum (100 MHz,  $\text{THF-d}_8$  (\*)) of  $[\text{Li}(\text{bimca}^{\text{C5}})]$  (2) generated with  $\text{LiHMDS}$  (#);  $\text{HMDS}$  (#).

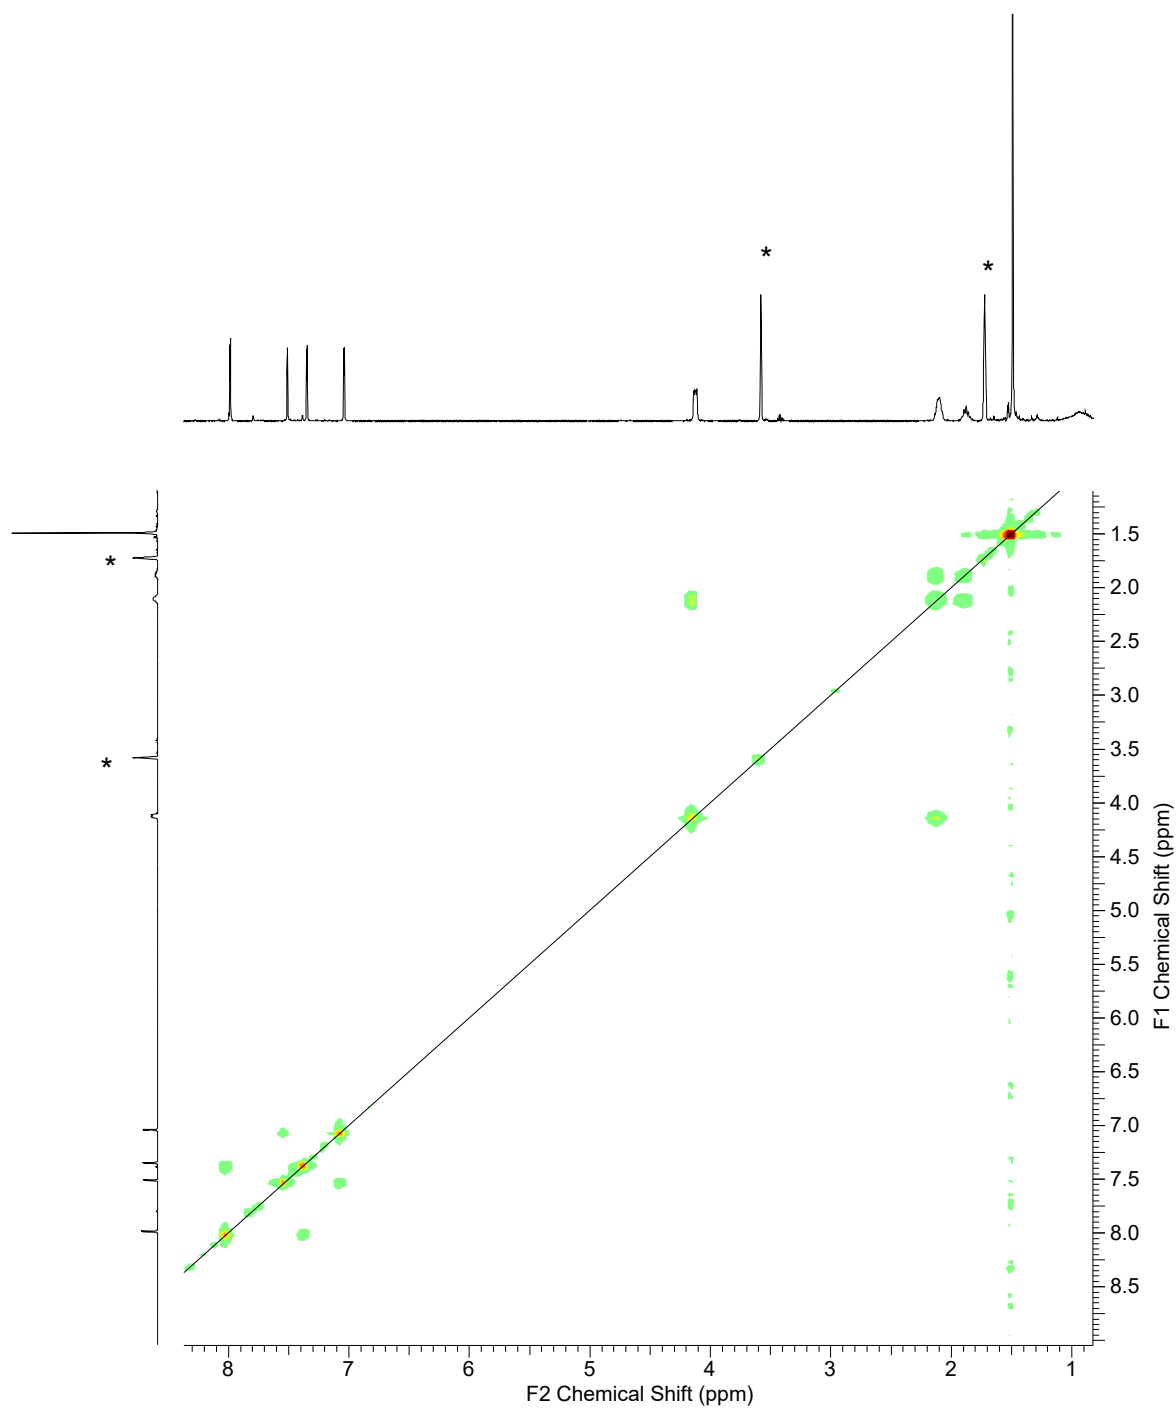

Figure 6:  $^1\text{H}$ ,  $^1\text{H}$  COSY-NMR spectrum (detail) (400 MHz,  $\text{THF-d}_8$  (\*)) of  $[\text{Li}(\text{bimca}^{\text{C5}})]$  (2).

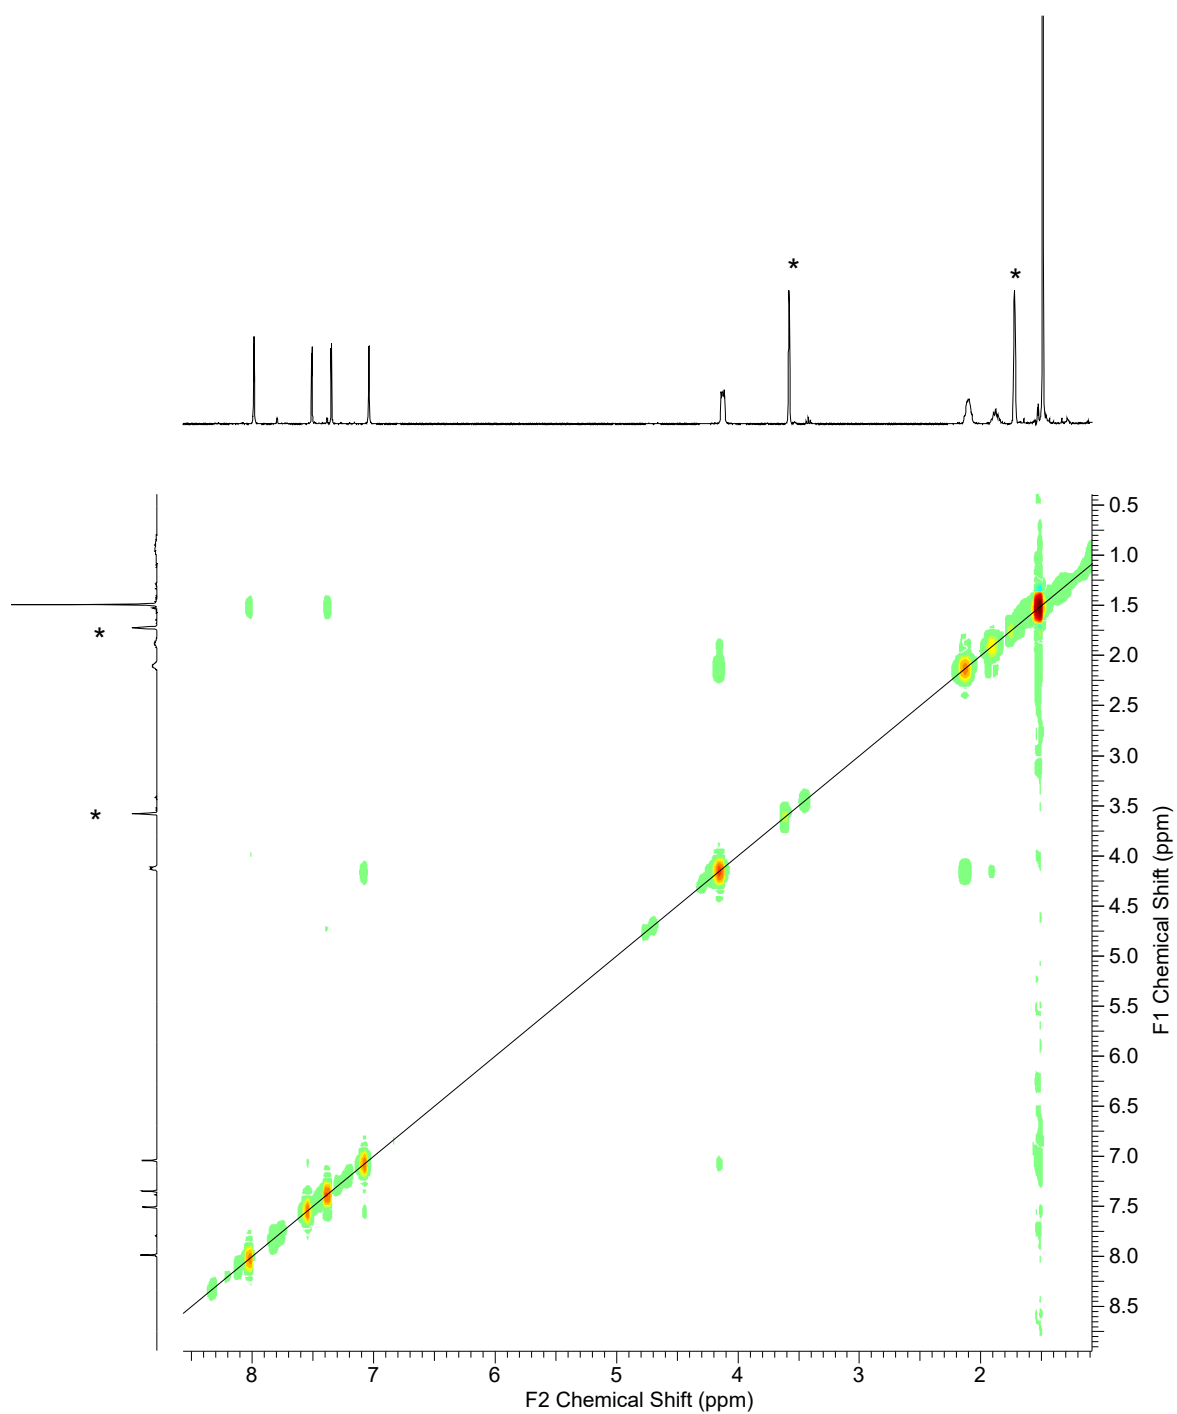

Figure 7:  $^1\text{H}, ^1\text{H}$  NOESY-NMR spectrum (detail) (400 MHz,  $\text{THF-d}_8$  (\*)) of  $[\text{Li}(\text{bimca}^{\text{C5}})]$  (2).

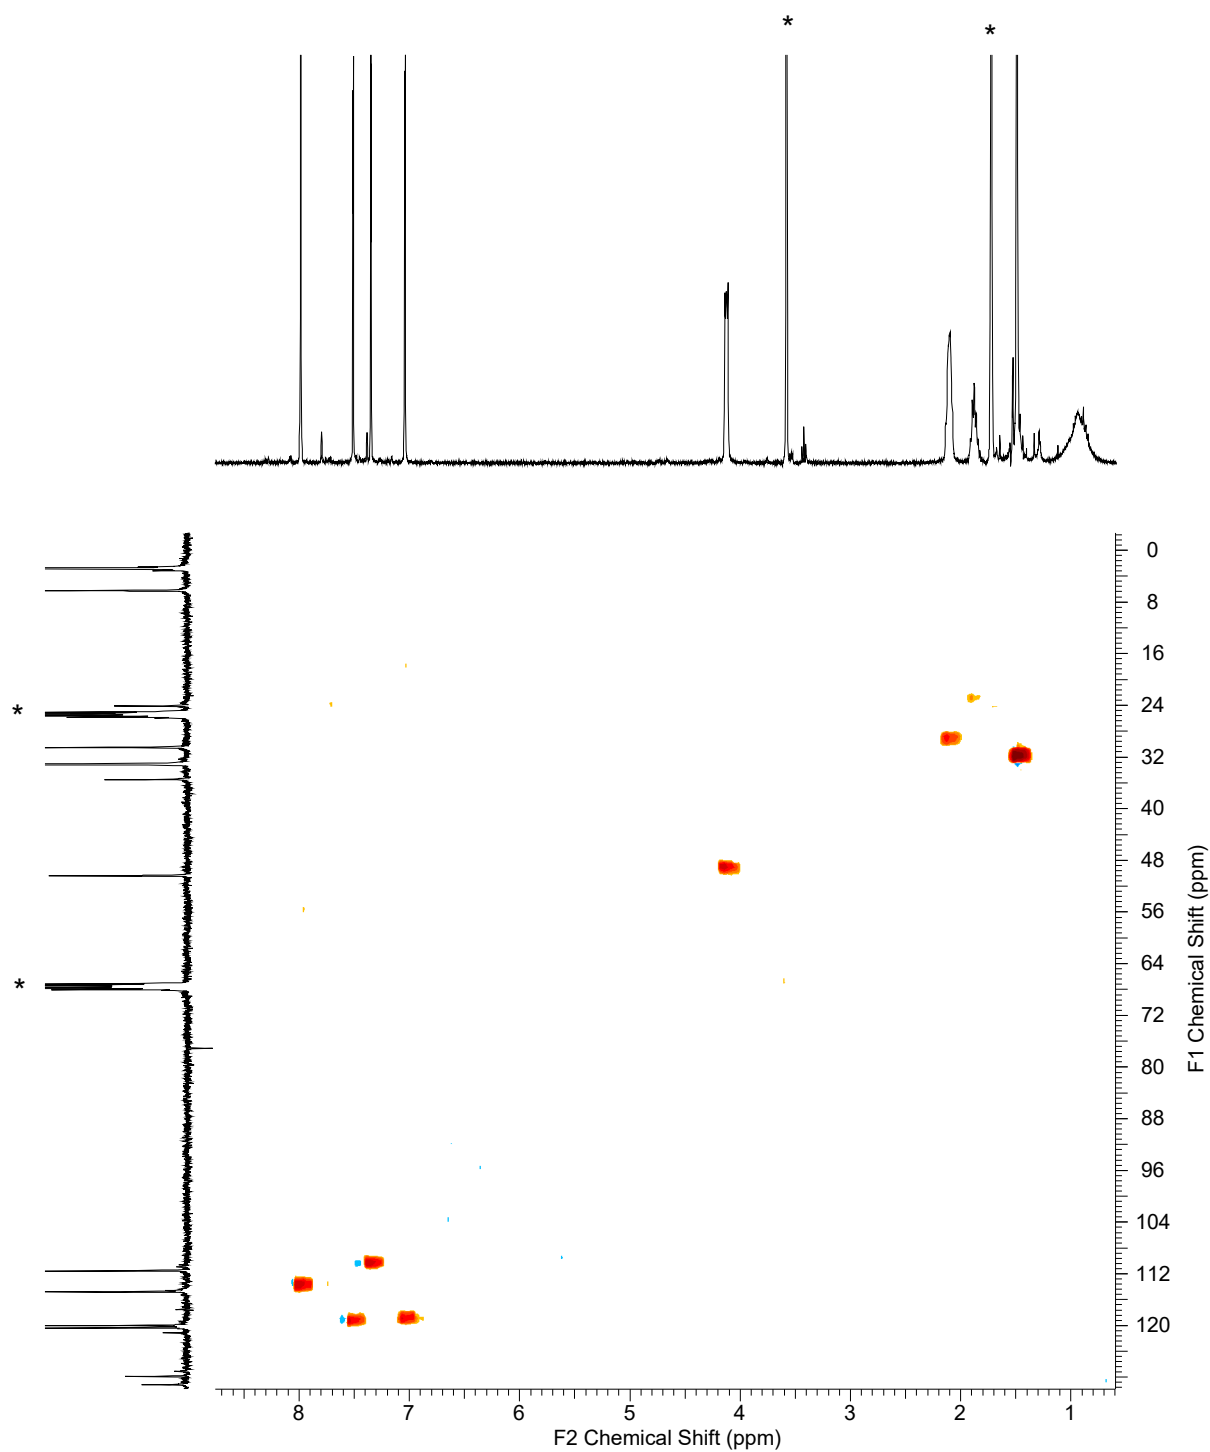

Figure 8:  $^1\text{H}$ ,  $^{13}\text{C}$  HSQC-NMR spectrum (detail) (400 MHz,  $\text{THF-d}_8$  (\*)) of  $[\text{Li}(\text{bimca}^{\text{C5}})]$  (2).

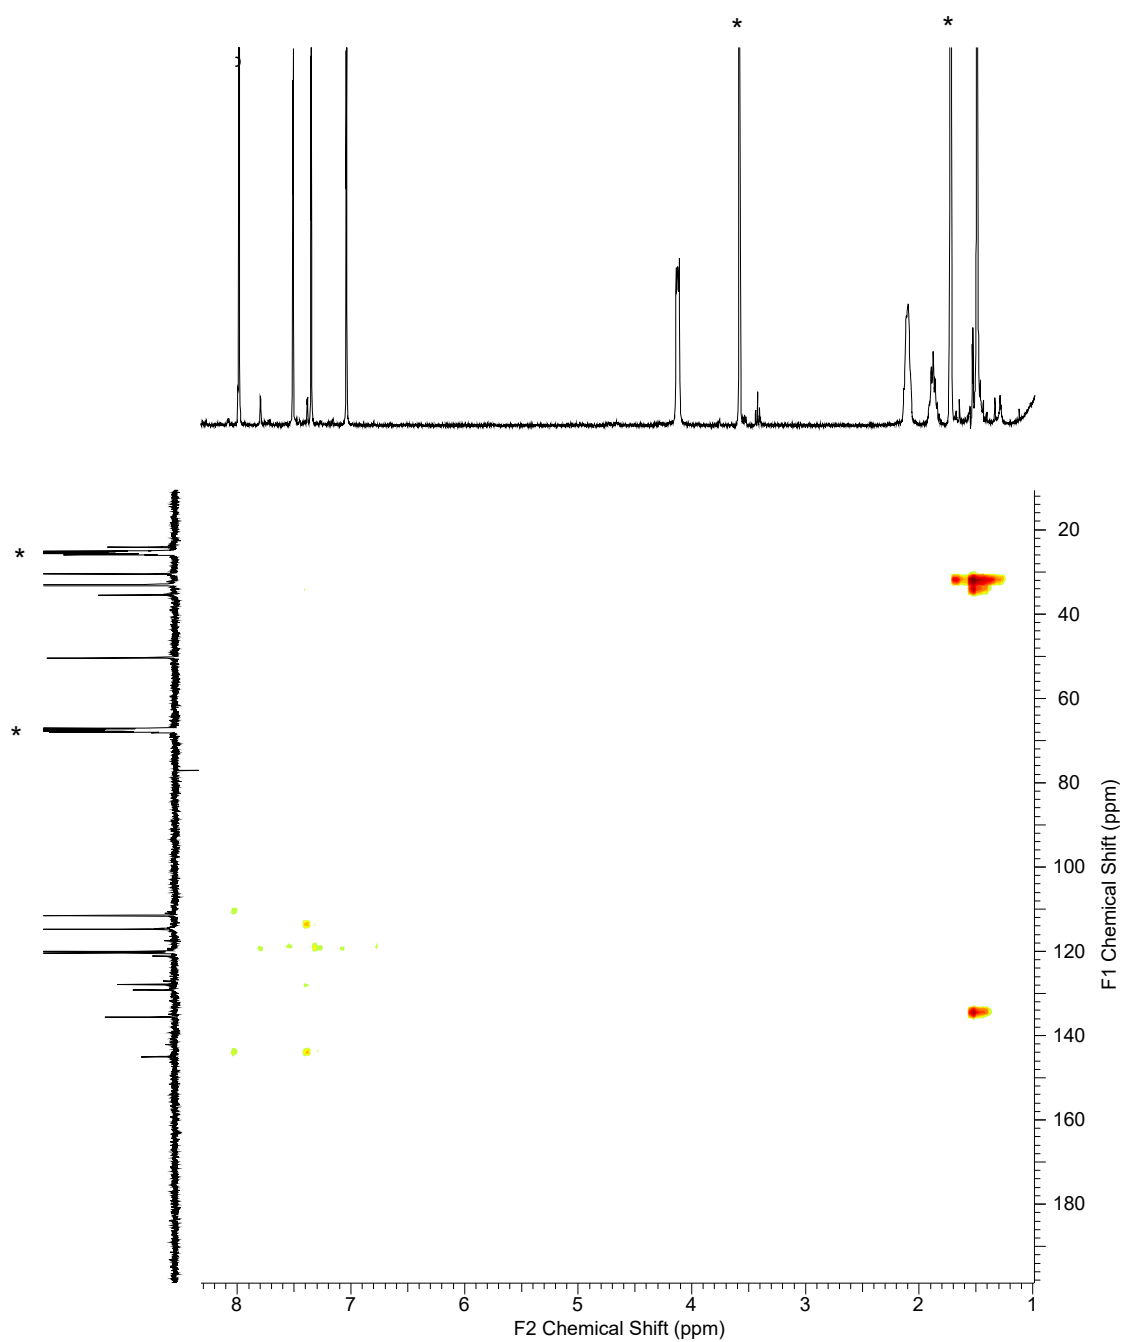

Figure 9:  $^1\text{H}$ ,  $^{13}\text{C}$  HMBC-NMR spectrum (detail) (400 MHz,  $\text{THF-d}_8$  (\*)) of  $[\text{Li}(\text{bimca}^{\text{C}5})]$  (2).



**Low temperature measurement:**

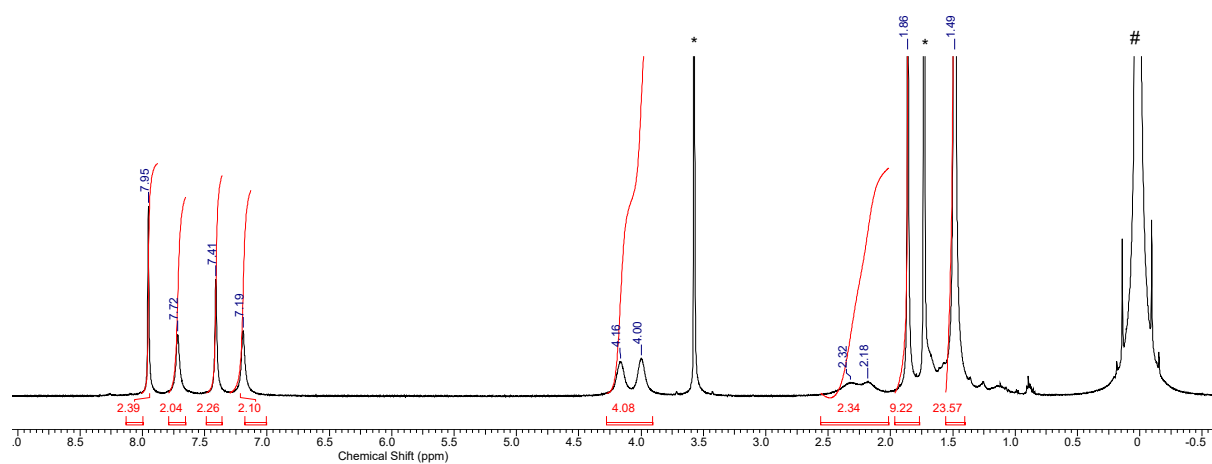

Figure 10:  $^1\text{H}$  NMR spectrum (500 MHz,  $\text{THF-d}_8$  (\*)) at  $-90^\circ\text{C}$  of  $[\text{Li}(\text{bimca}^{\text{C5}})]$  (2) generated with LiHMDS(#); HMDS (#).

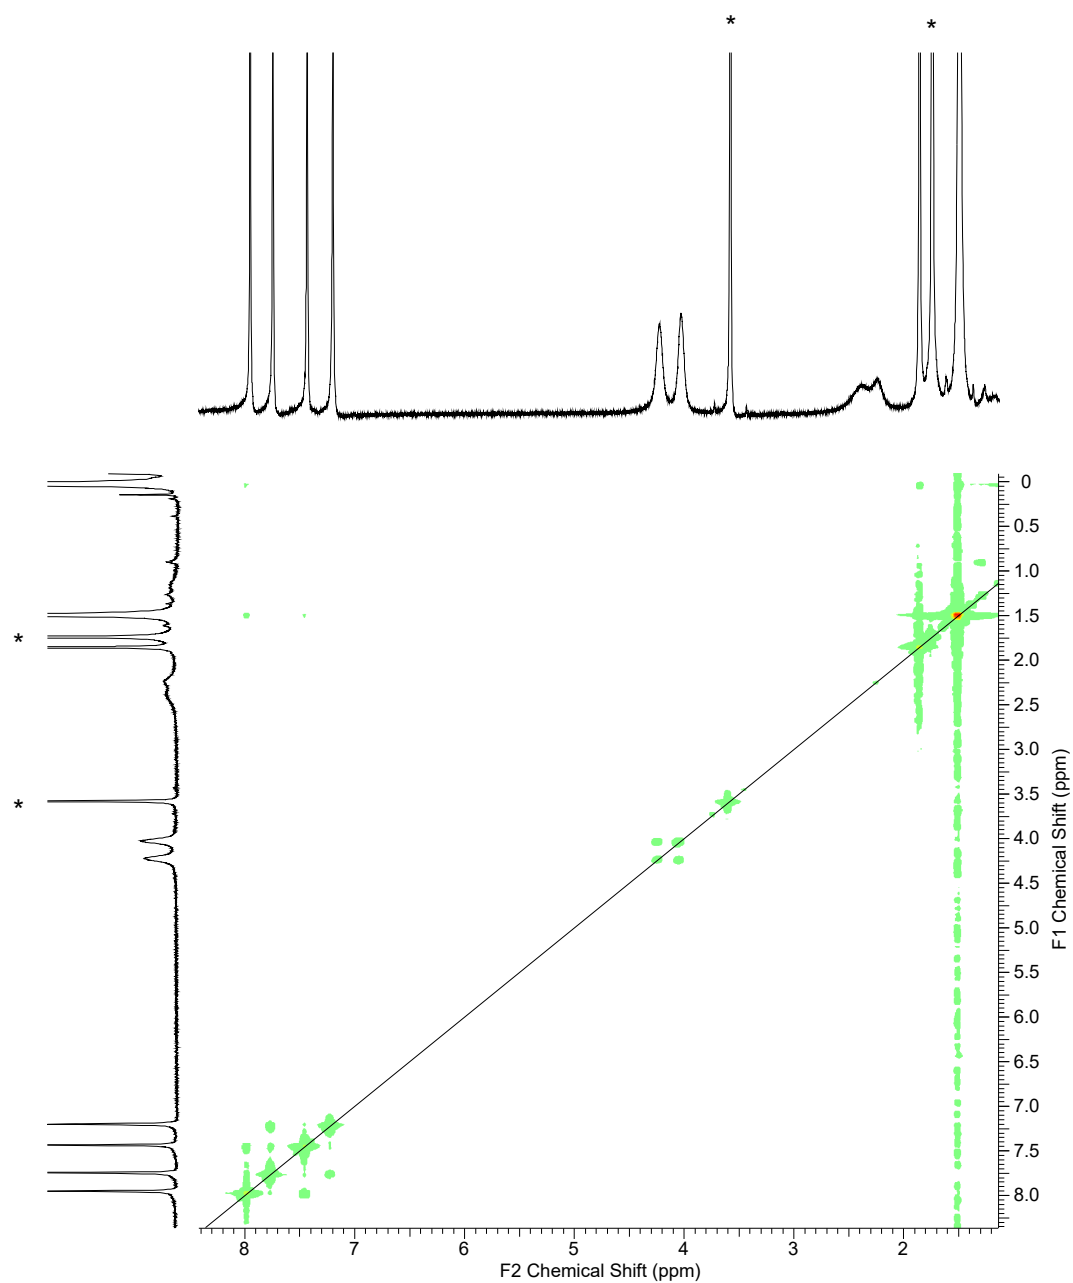

Figure 11:  $^1\text{H}$ ,  $^1\text{H}$  COSY spectrum (500 MHz,  $\text{THF-d}_8$  (\*)) (\*) at  $-90\text{ }^\circ\text{C}$  of  $[\text{Li}(\text{bimca}^{\text{C5}})]$  (2).

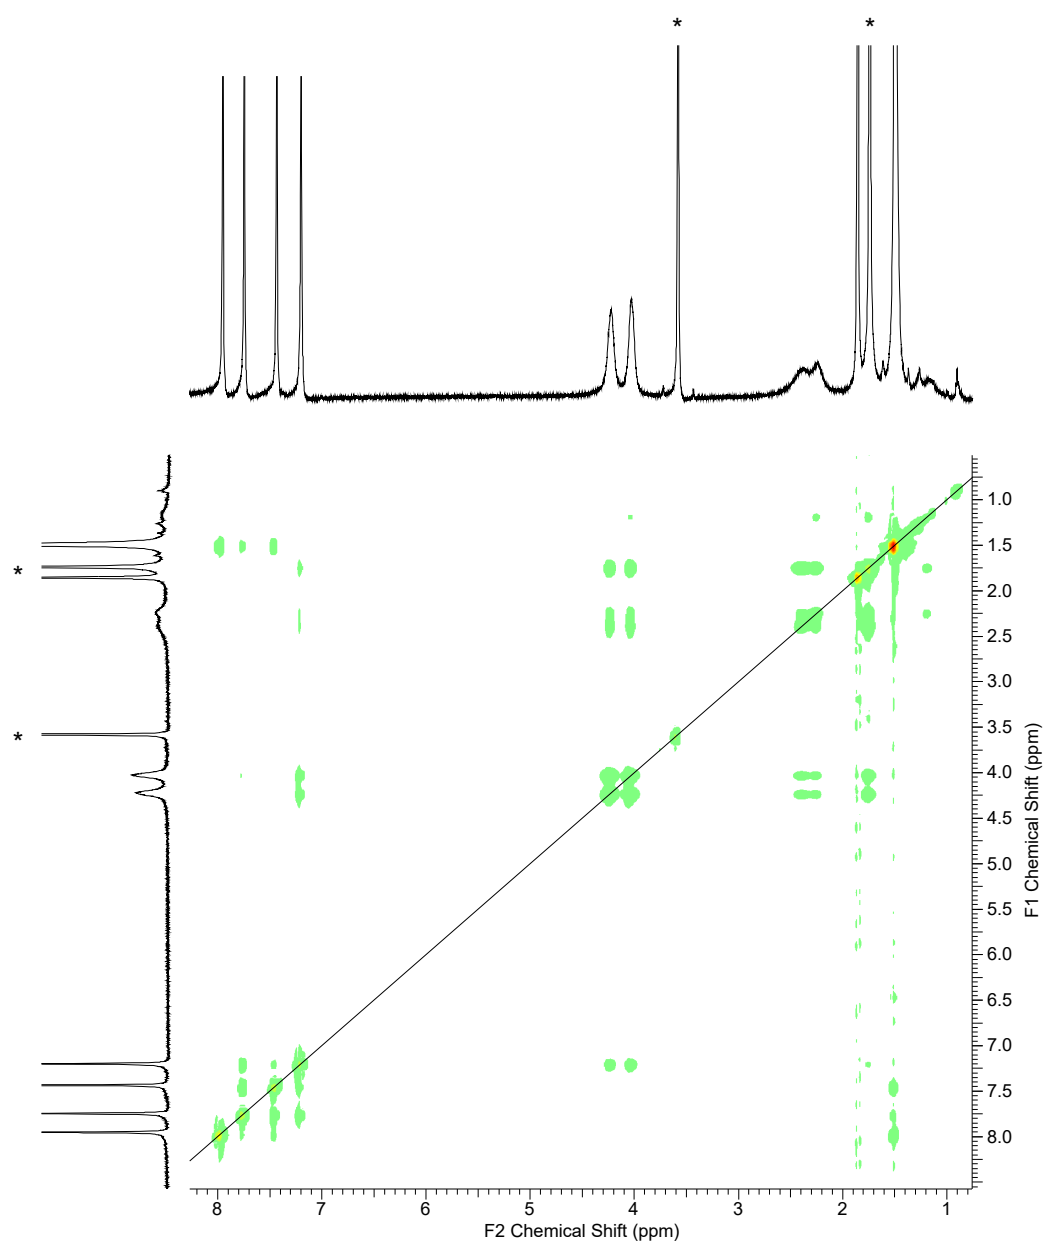

Figure 12:  $^1\text{H}$ ,  $^1\text{H}$  NOESY spectrum (500 MHz,  $\text{THF-d}_8$  (\*)) at  $-90^\circ\text{C}$  of  $[\text{Li}(\text{bimca}^{\text{C5}})]$  (2).

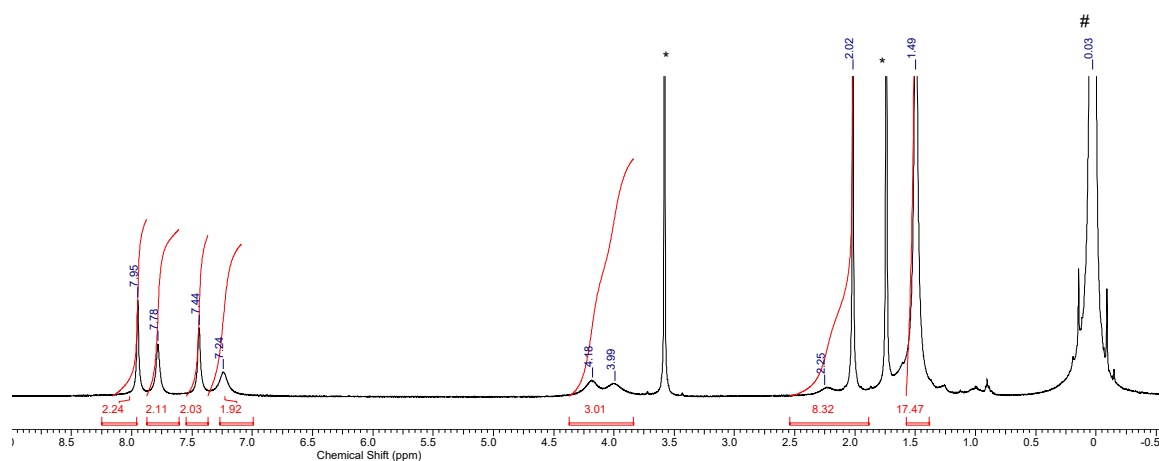

Figure 13:  $^1\text{H}$  NMR spectrum (500 MHz,  $\text{THF-d}_8$  (\*)) at  $-110\text{ }^\circ\text{C}$  of  $[\text{Li}(\text{bimca}^{\text{C5}})]$  (2) generated with LiHMDS (#); HMDS (#).

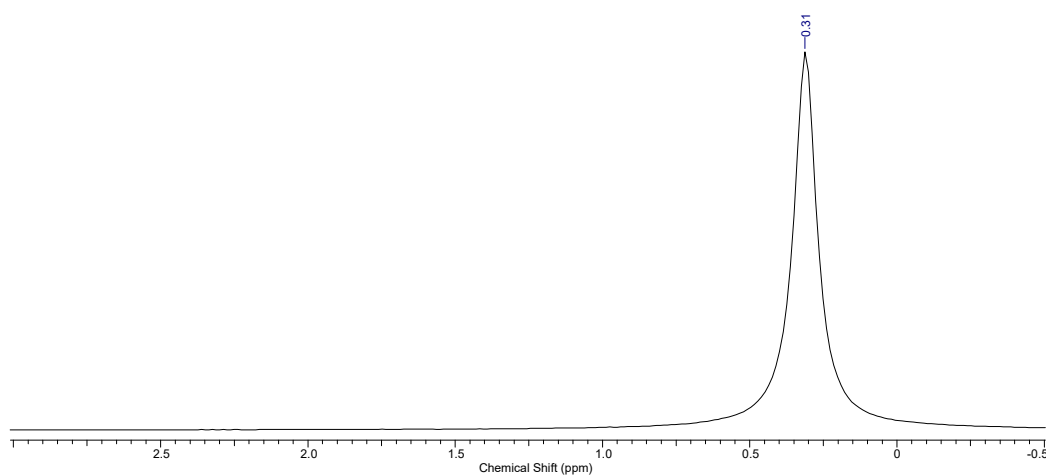

Figure 14:  $^7\text{Li}$  NMR spectrum (300 MHz,  $\text{THF-d}_8$ ) of  $[\text{Li}(\text{bimca}^{\text{C5}})]$  (2) at RT.

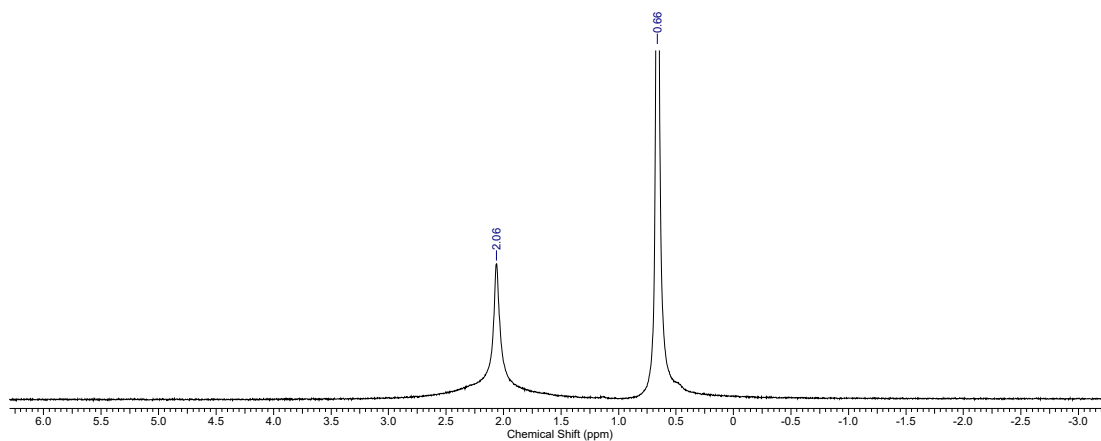

Figure 15:  $^7\text{Li}$  NMR spectrum (500 MHz,  $\text{THF-d}_8$ ) at  $-90\text{ }^\circ\text{C}$  of  $[\text{Li}(\text{bimca}^{\text{C5}})]$  (**2**) generated with  $\text{LiHMDS}(\#)$ ;  $\text{HMDS}(\#)$ .

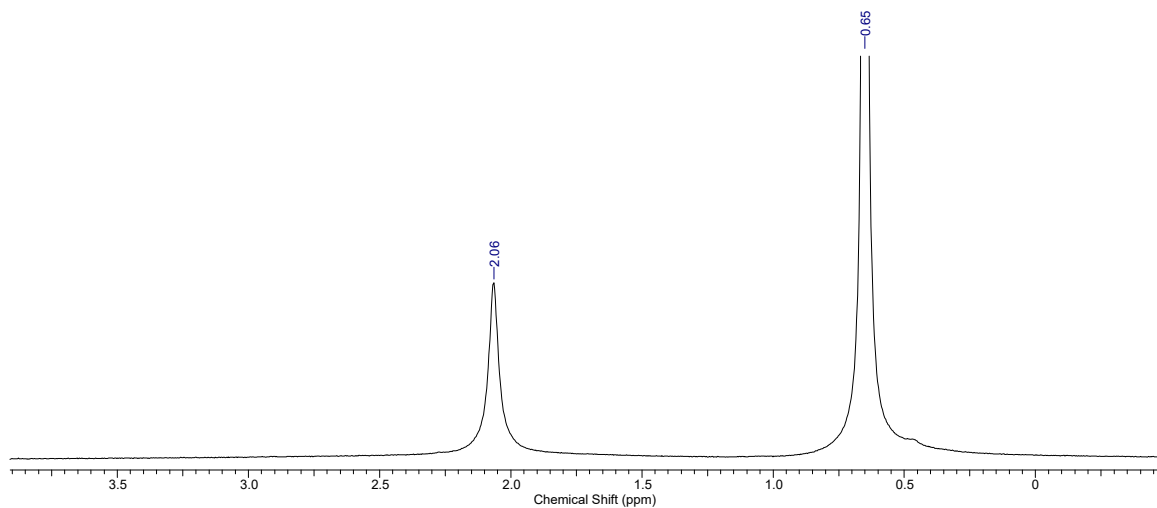

Figure 16:  $^7\text{Li}$  NMR spectrum (500 MHz,  $\text{THF-d}_8$ ) at  $-110\text{ }^\circ\text{C}$  of  $[\text{Li}(\text{bimca}^{\text{C5}})]$  (**2**) with  $\text{LiHMDS}(\#)$ ;  $\text{HMDS}(\#)$ .

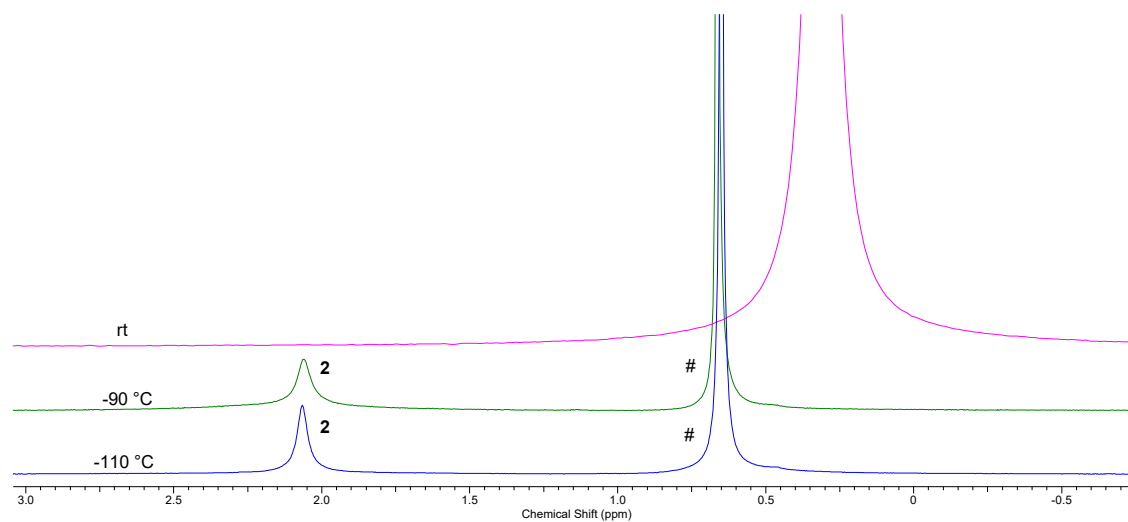

Figure 17: VT  $^7\text{Li}$  NMR spectra (300 and 500 MHz,  $\text{THF-d}_8$ ) of  $[\text{Li}(\text{bimca}^{\text{C5}})]$  (2) generated with  $\text{LiHMDS}(\#)$ ;  $\text{LiX}(\#)$ .

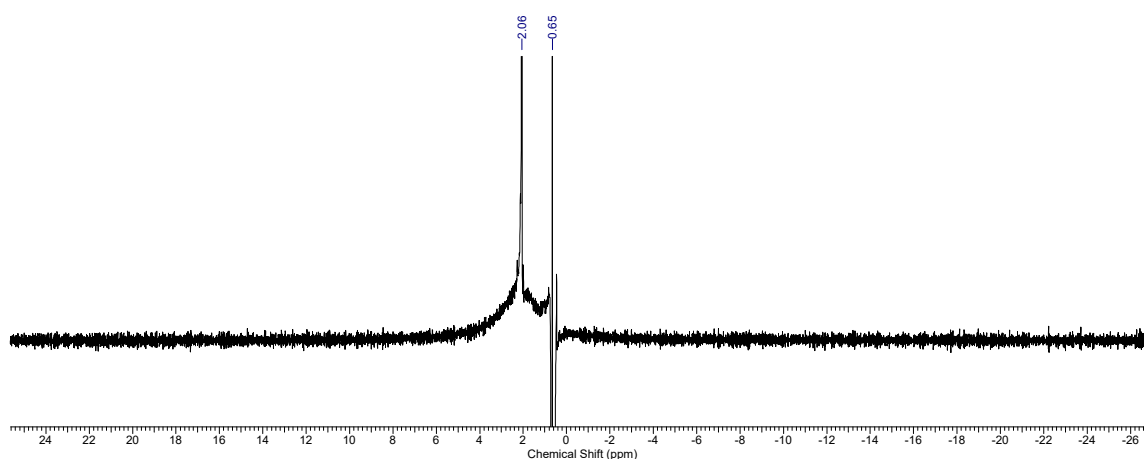

Figure 18:  $^7\text{Li}$  NMR spectrum (500 MHz,  $\text{THF-d}_8$ ) at  $-110^\circ\text{C}$  of  $[\text{Li}(\text{bimca}^{\text{C5}})]$  (2) generated with  $\text{LiHMDS}/\text{HMDS}(\#)$ . Resolution enhanced version of [Figure 16](#) by gaussian windows multiplication (apodisation).

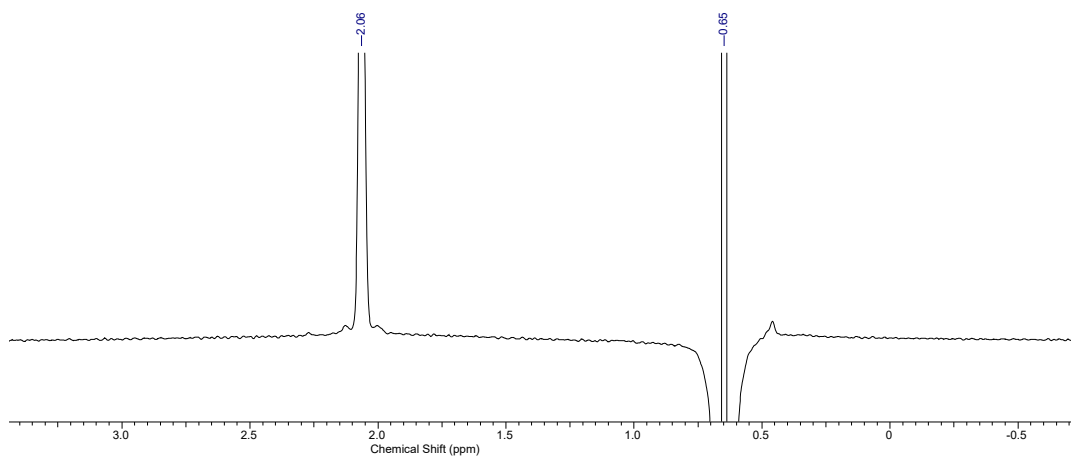

Figure 19: Detail of ~~Figure 18~~ to emphasize the  $^{13}\text{C}$  satellites ( $^1\text{J}(\text{}^7\text{Li}^{13}\text{C})$ ) of the signal at 2.06 ppm.

**[K(bimca<sup>C5</sup>)] (3):**

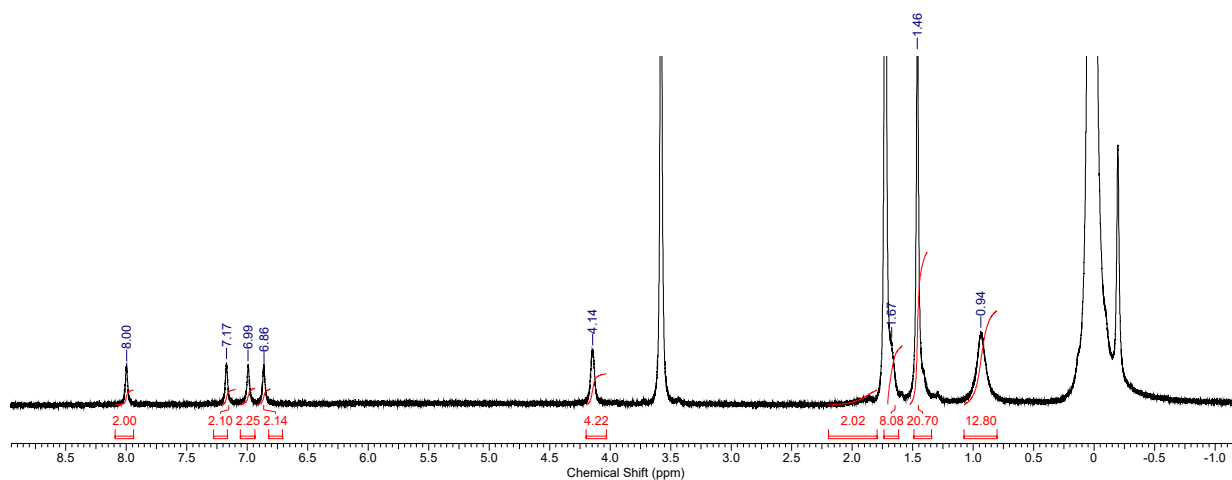

Figure 20: <sup>1</sup>H NMR spectrum (400 MHz, THF-d<sub>8</sub> (\*)) of [K(bimca<sup>C5</sup>)] (3) generated with KHMDS(#); HMDS (#).

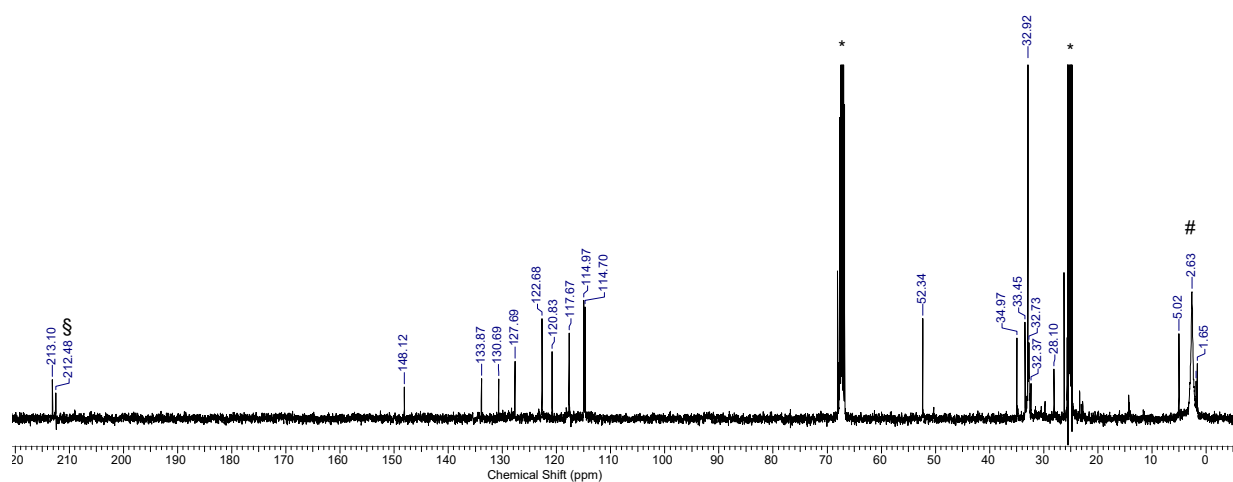

Figure 21: <sup>13</sup>C NMR spectrum (100 MHz, THF-d<sub>8</sub> (\*)) of [K(bimca<sup>C5</sup>)] (3) generated with KHMDS(#); HMDS (#), artefact (§).



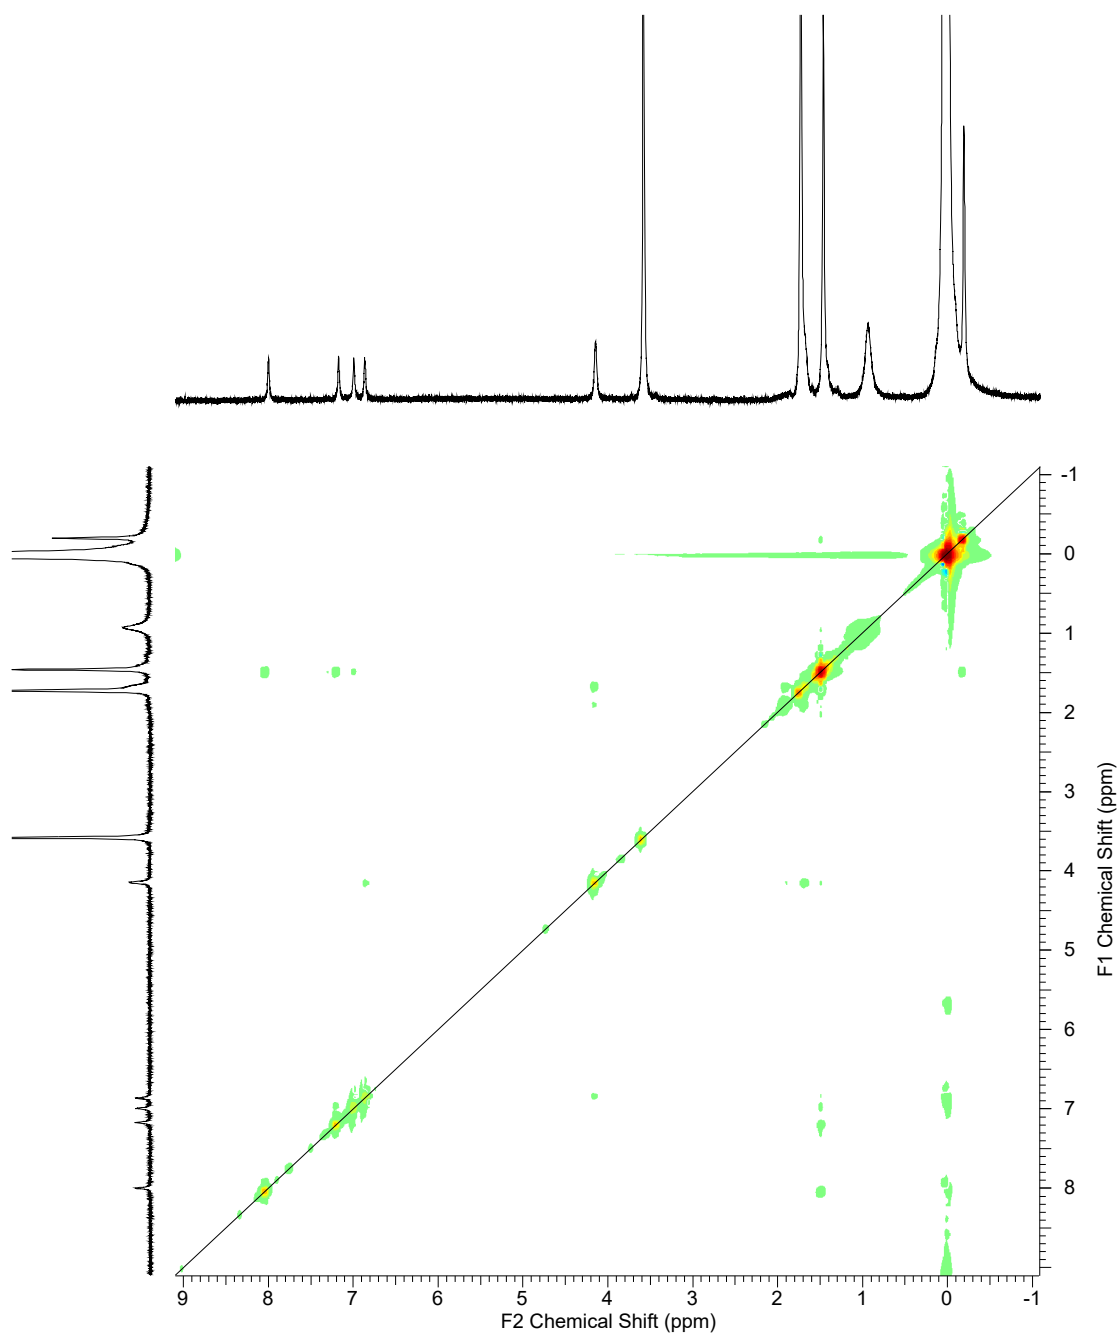

Figure 22:  $^1\text{H}, ^1\text{H}$  NOESY-NMR spectrum (500 MHz,  $\text{THF-d}_8$  (\*)) of  $[\text{K}(\text{bimca}^{\text{C5}})]$  (**3**) (# = HMDS/KHMDS).

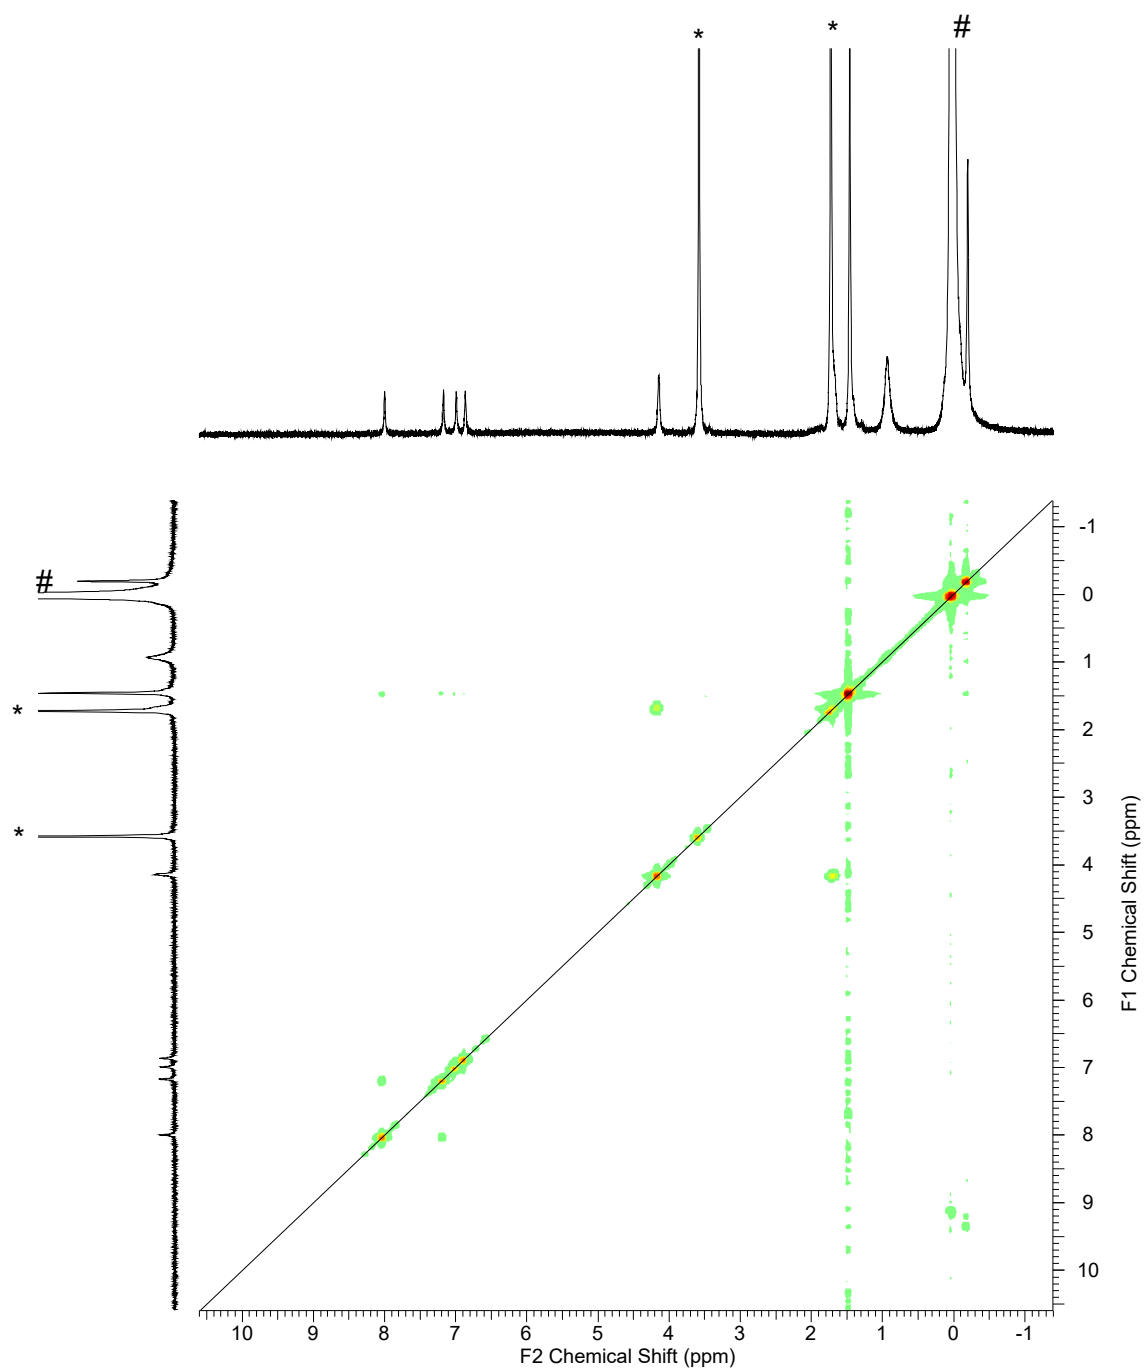

Figure 23:  $^1\text{H}$ ,  $^1\text{H}$  COSY-NMR spectrum (500 MHz,  $\text{THF-d}_8$  (\*)) of  $[\text{K}(\text{bimca}^{\text{C}5})]$  (**3**) (# = HMDS/KHMDS.)

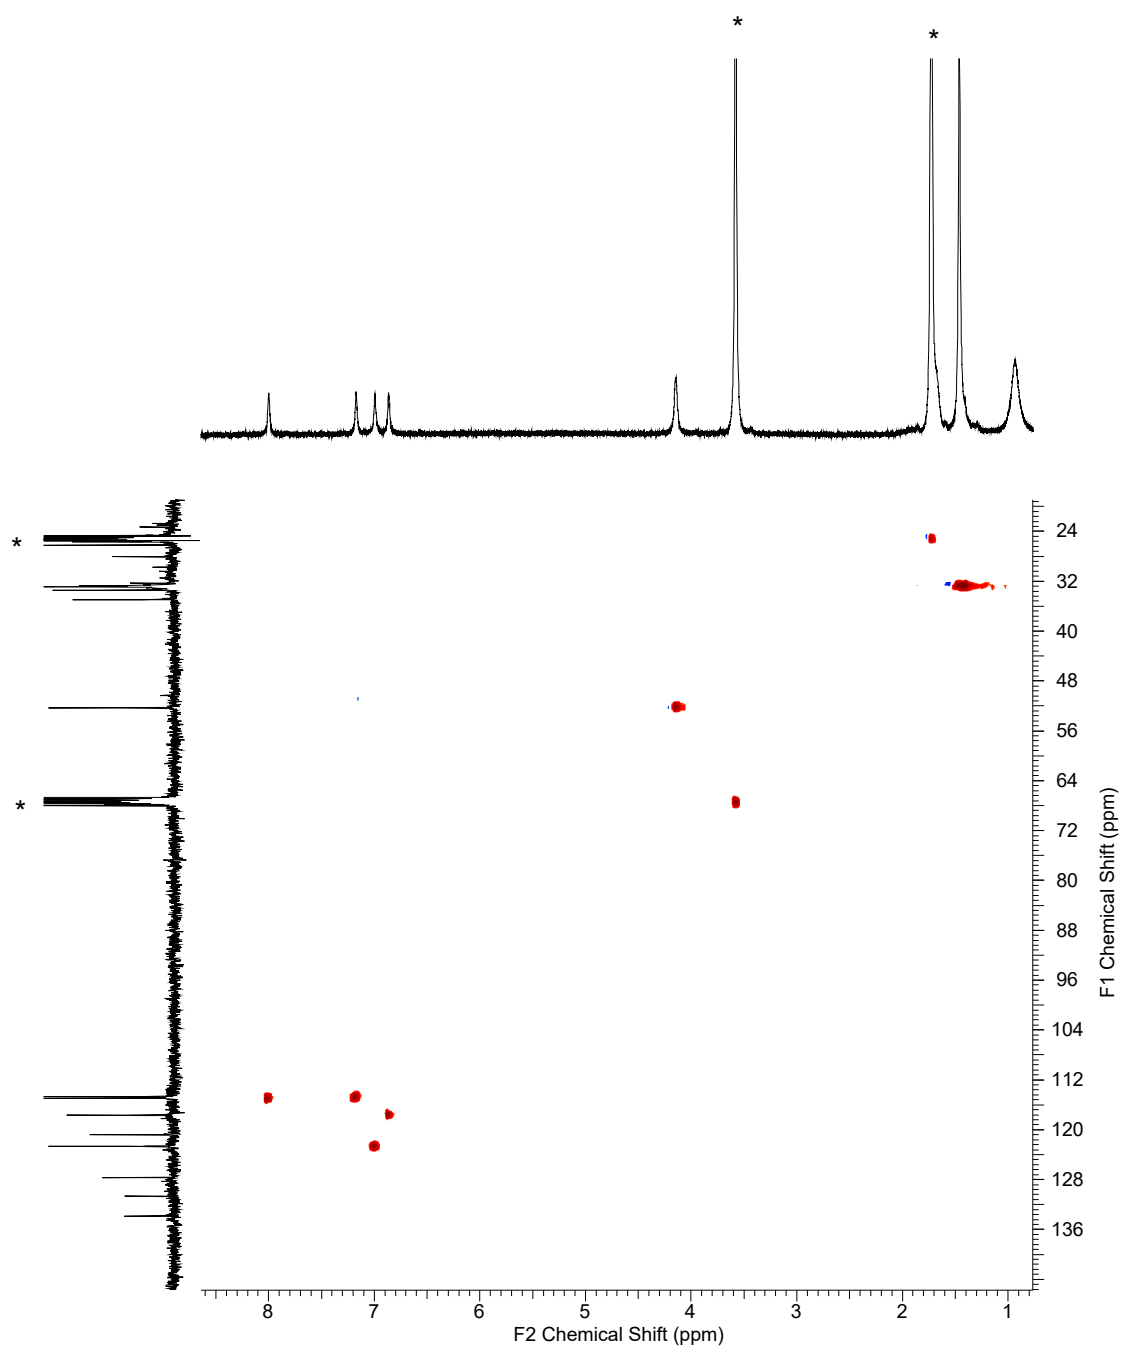

Figure 24:  $^1\text{H}$ ,  $^{13}\text{C}$  HSQC NMR spectrum (500 MHz,  $\text{THF-d}_8$  (\*)) of  $[\text{K}(\text{bimca}^{\text{C5}})]$  (**3**).

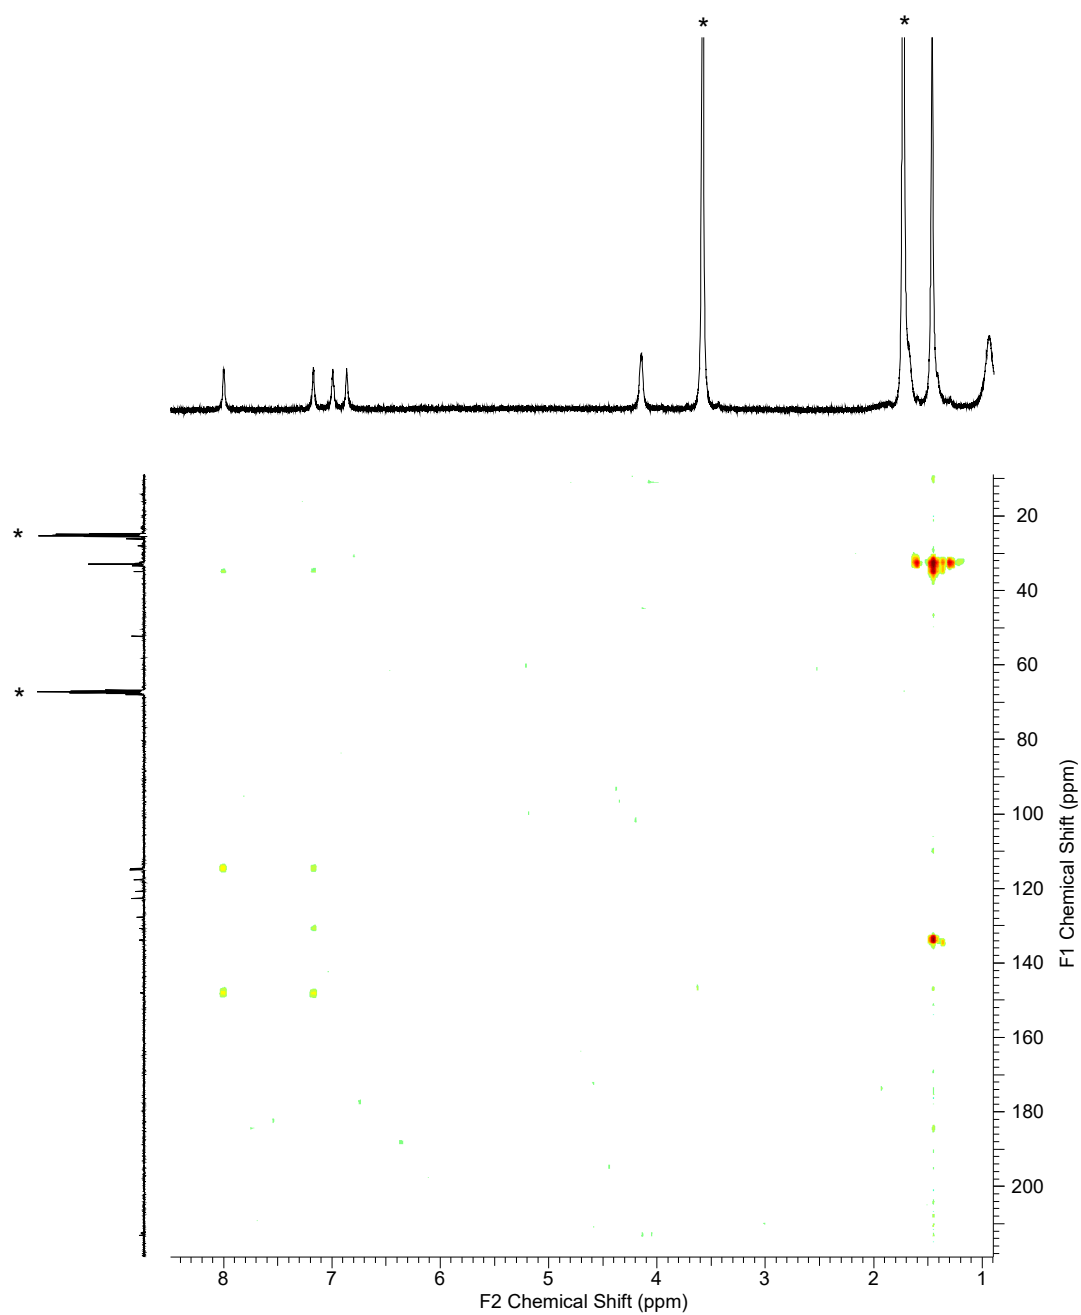

Figure 25:  $^1\text{H}$ ,  $^{13}\text{C}$  HMBC NMR spectrum (400 MHz,  $\text{THF-d}_8$  (\*)) of  $[\text{K}(\text{bimca}^{\text{C}5})]$  (**3**).

**[Ru(bimca<sup>C5</sup>)Cp\*] (4):**

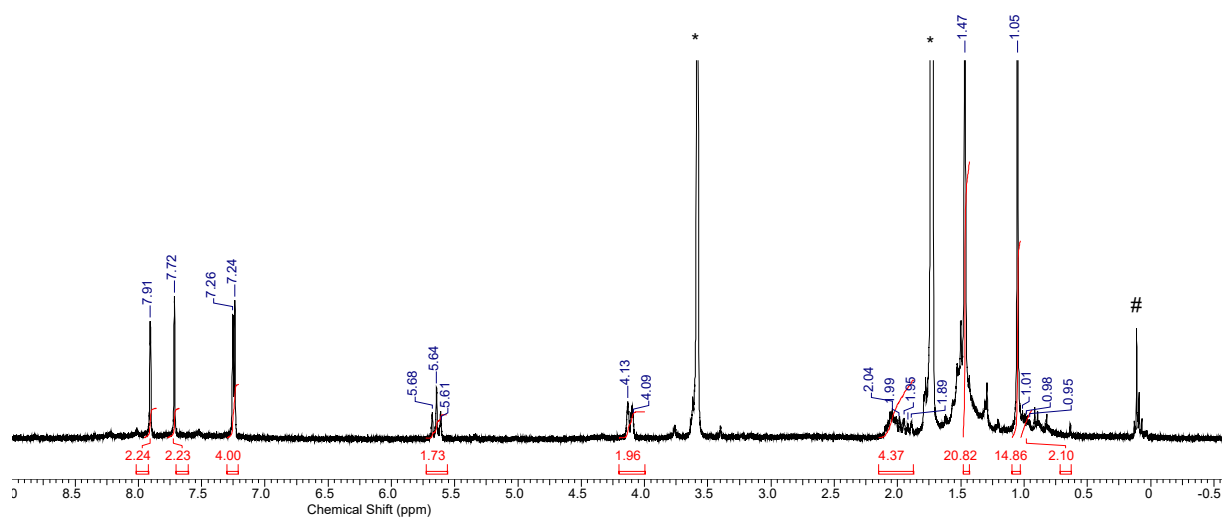

Figure 26: <sup>1</sup>H NMR spectrum (400 MHz, THF-d<sub>8</sub> (\*)) of [Ru(bimca<sup>C5</sup>)Cp\*] (3) HMDS/grease (#).

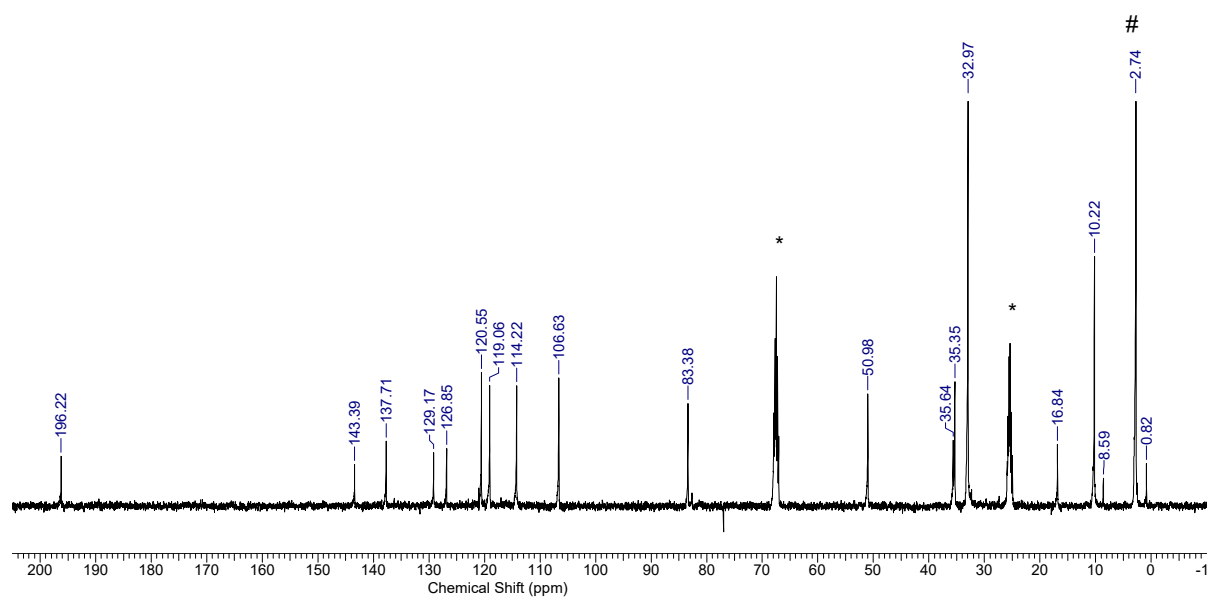

Figure 27: <sup>13</sup>C NMR spectrum (100 MHz, THF-d<sub>8</sub> (\*)) of [Ru(bimca<sup>C5</sup>)Cp\*] (4); HMDS (#).

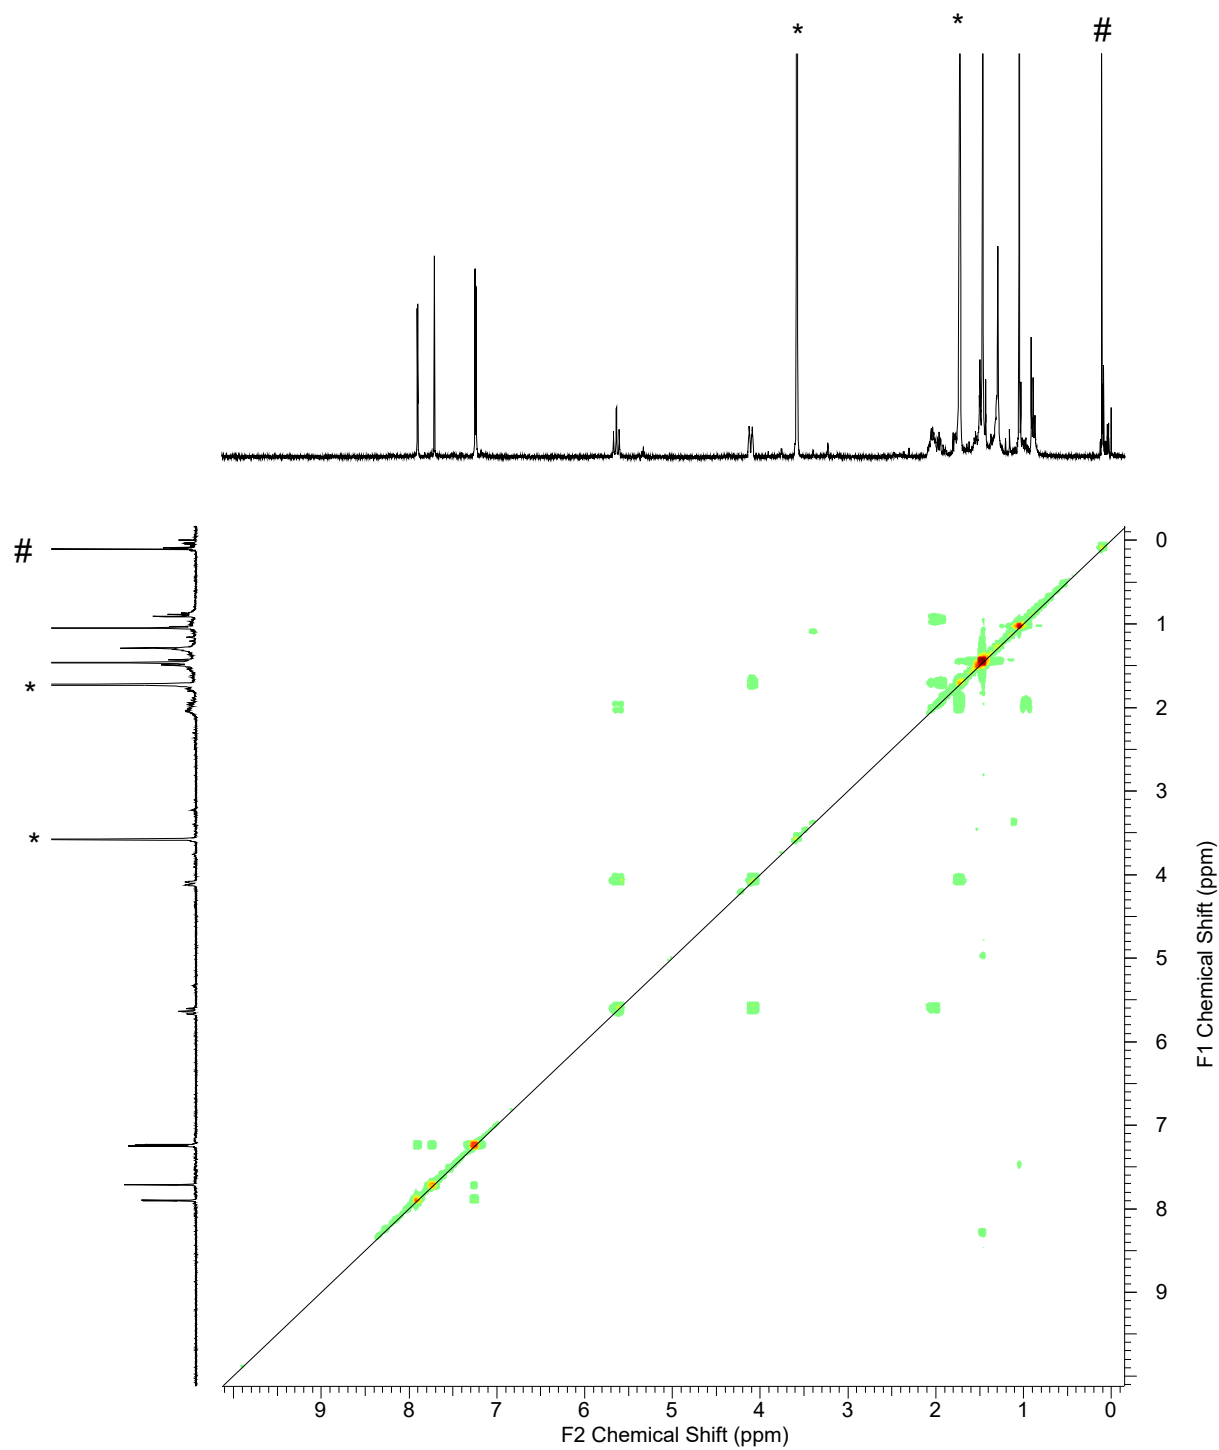

Figure 28:  $^1\text{H}$ - $^1\text{H}$  COSY NMR spectrum ( $\text{THF-d}_8$  (\*)) of  $[\text{Ru}(\text{bimca}^{\text{C}5})\text{Cp}^*]$  (4); HMDS (#).

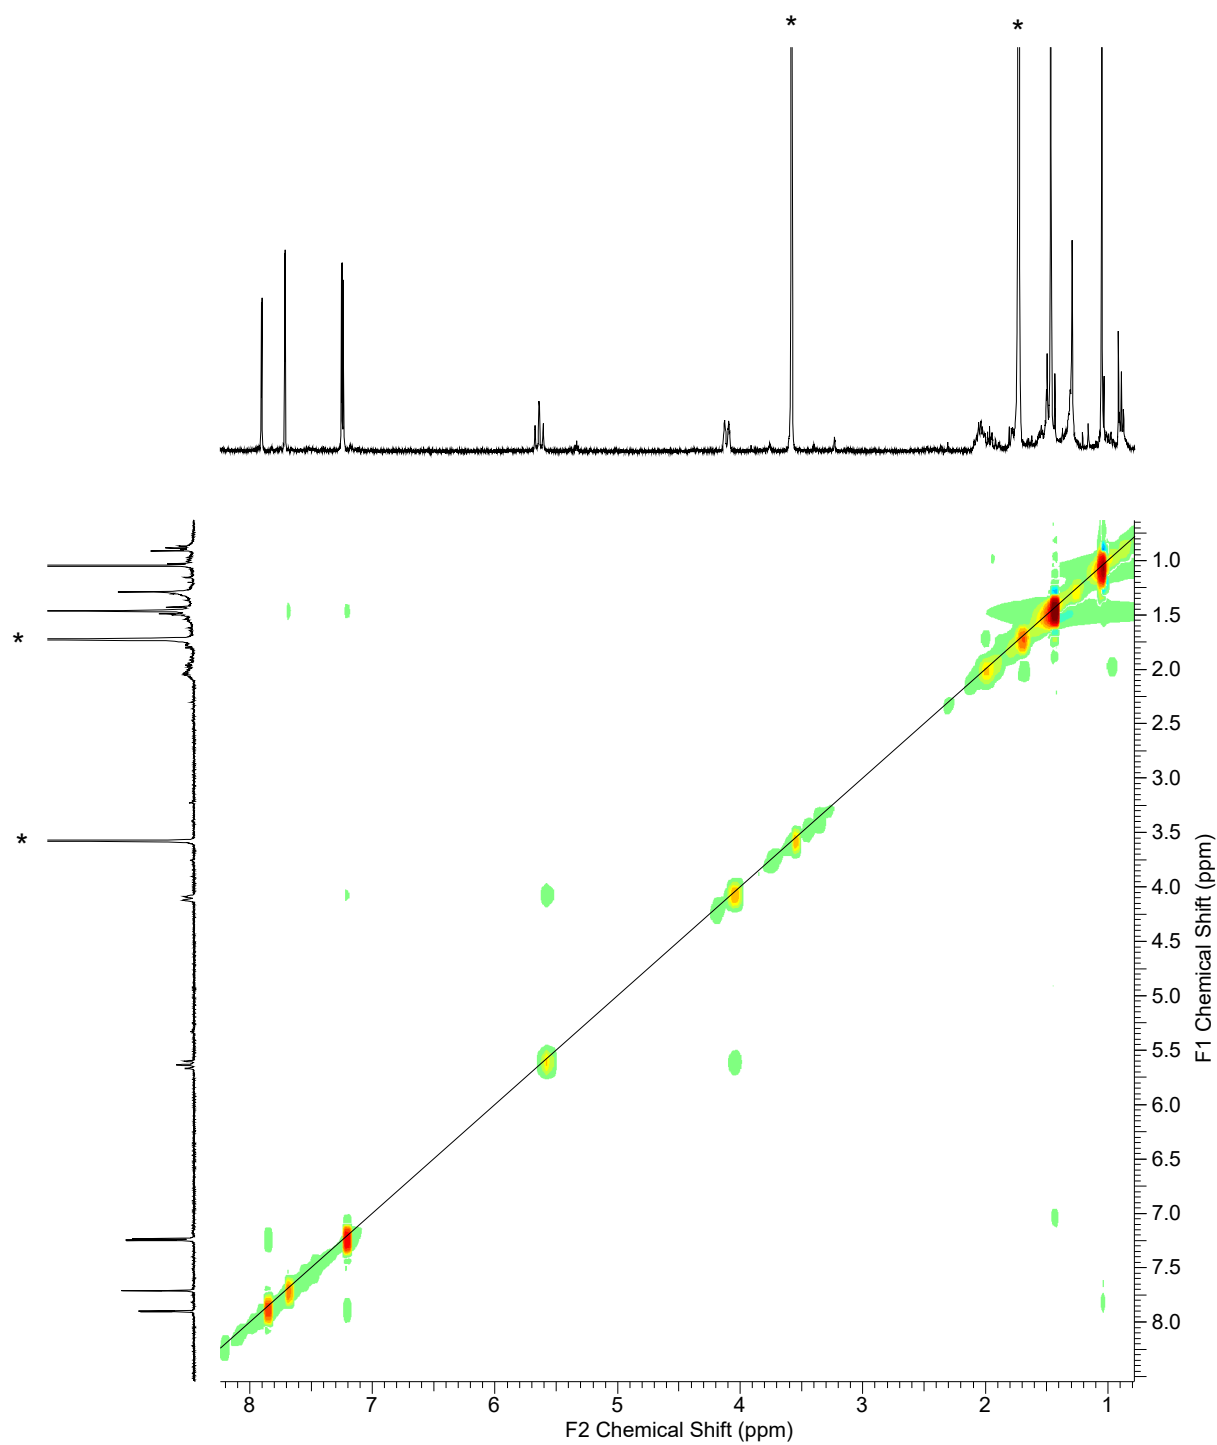

Figure 29:  $^1\text{H}$ - $^1\text{H}$  COSY NMR spectrum (detail) ( $\text{THF-d}_8$  (\*)) of  $[\text{Ru}(\text{bimca}^{\text{C5}})\text{Cp}^*]$  (4).

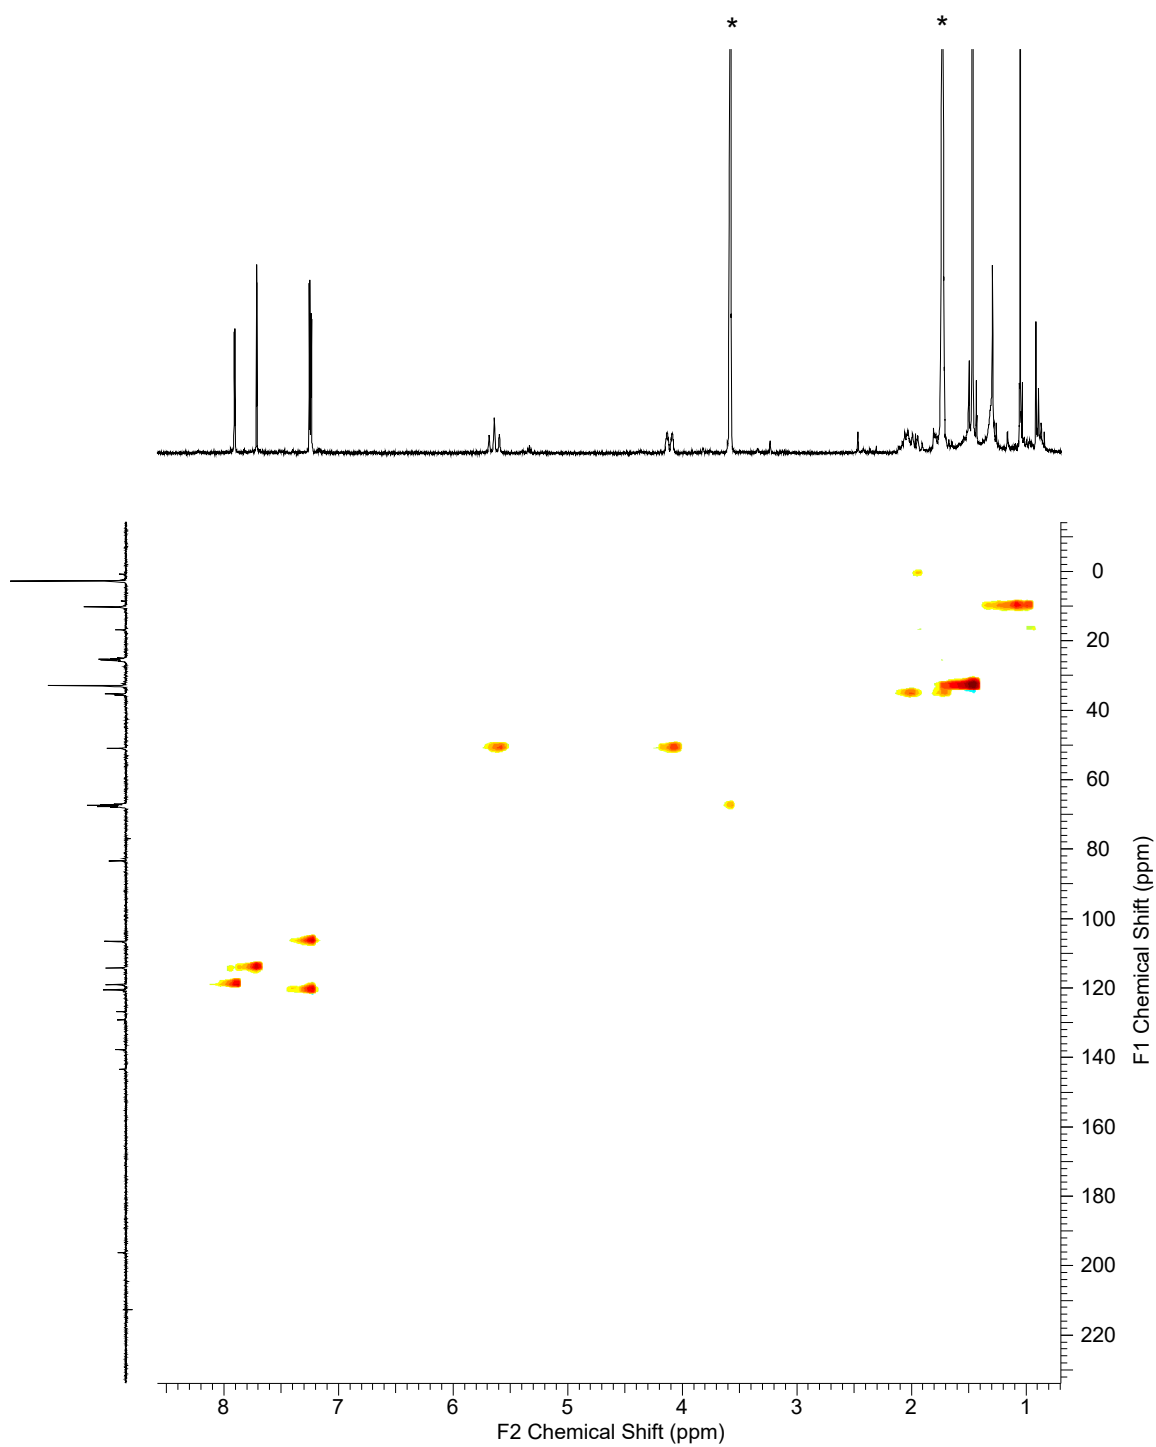

Figure 30:  $^1\text{H}$ ,  $^{13}\text{C}$  HSQC NMR spectrum (detail) ( $\text{THF-d}_8$  (\*)) of  $[\text{Ru}(\text{bimca}^{\text{C5}})\text{Cp}^*]$  (**4**).



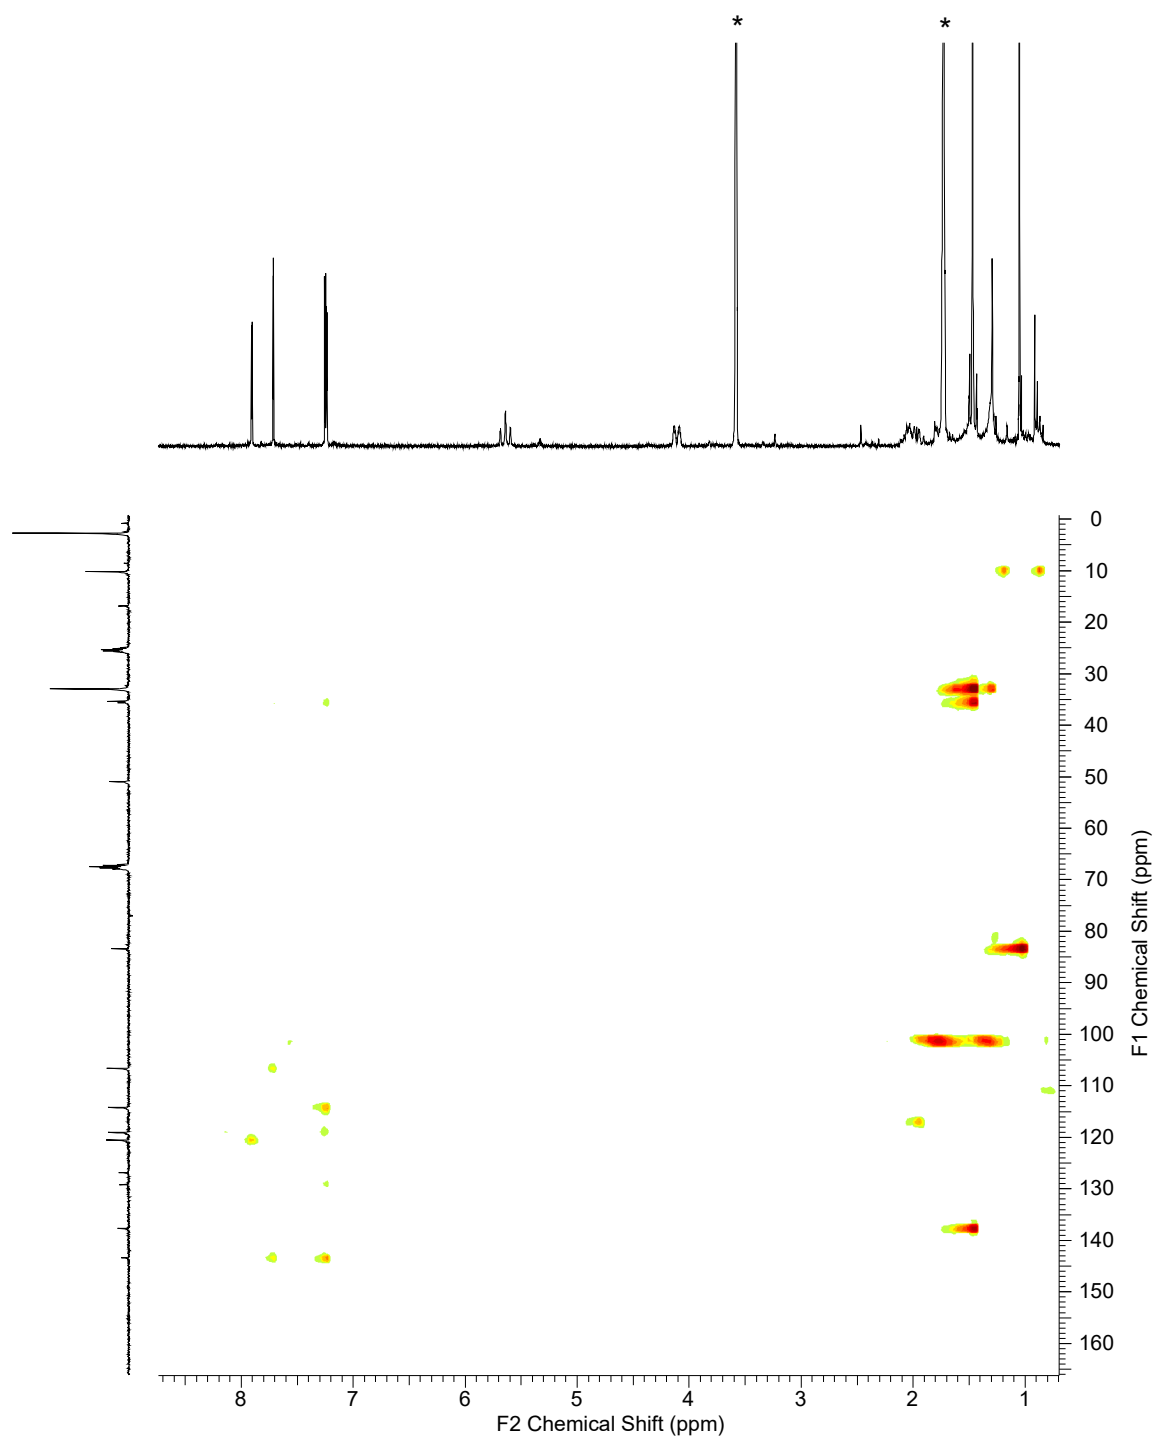

Figure 31:  $^1\text{H}$ ,  $^{13}\text{C}$  HMBC NMR spectrum (detail) ( $\text{THF-d}_8$  (\*)) of  $[\text{Ru}(\text{bimca}^{\text{C}5})\text{Cp}^*]$  (**4**).

**[Ru(bimca<sup>C5H8</sup>)Br(PPh<sub>3</sub>)] (5):**

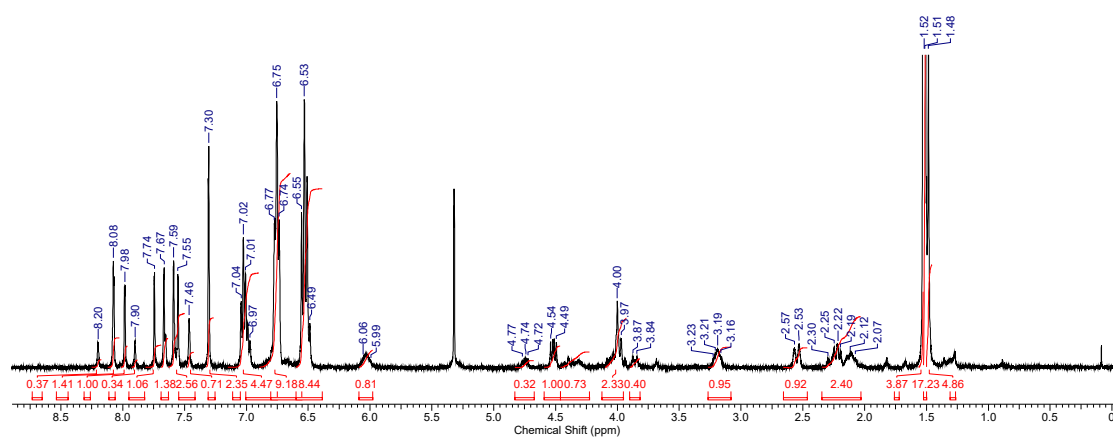

Figure 32: <sup>1</sup>H NMR spectrum (400 MHz, DCM-d<sub>2</sub> (\*)) of [Ru(bimca<sup>C5H8</sup>)Br(PPh<sub>3</sub>)] (5).

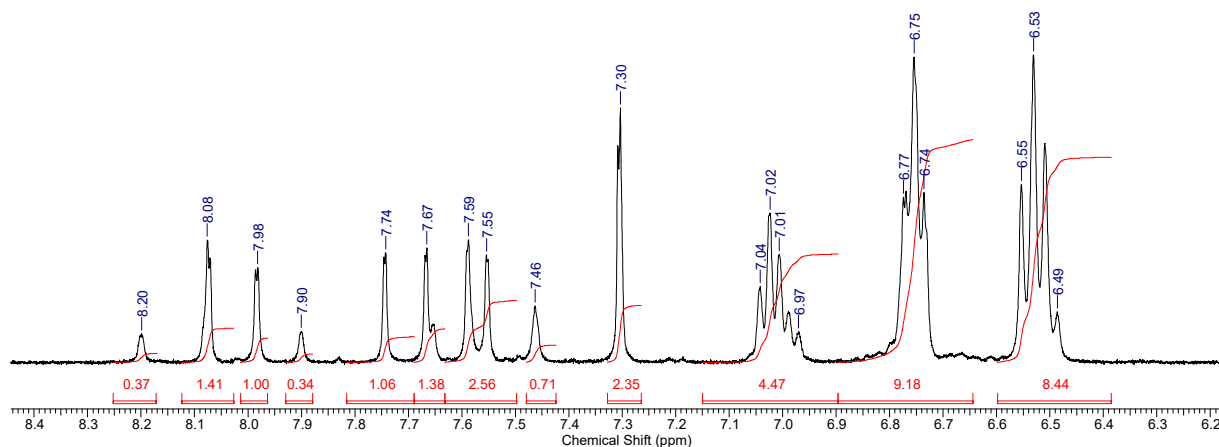

Figure 33: <sup>1</sup>H NMR spectrum (detail) (400 MHz, DCM-d<sub>2</sub> (\*)) of [Ru(bimca<sup>C5H8</sup>)Br(PPh<sub>3</sub>)] (5).

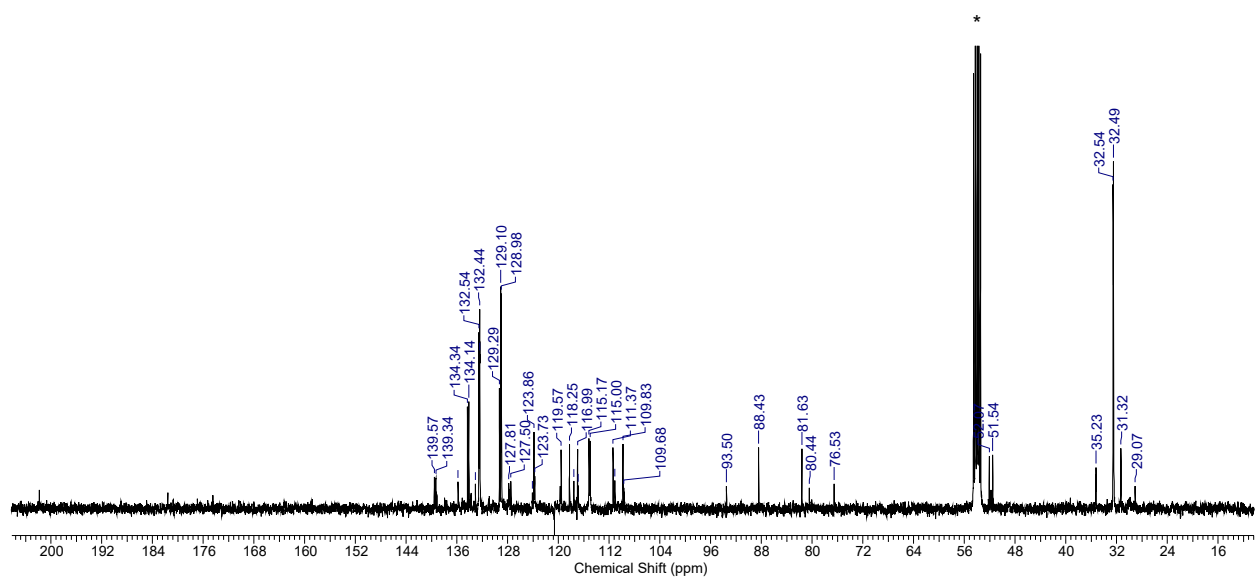

Figure 34:  $^{13}\text{C}$  NMR spectrum (100 MHz,  $\text{DCM-d}_2$  (\*)) of  $[\text{Ru}(\text{bimca}^{\text{C}5\text{H}8})\text{Br}(\text{PPh}_3)]$  (5).

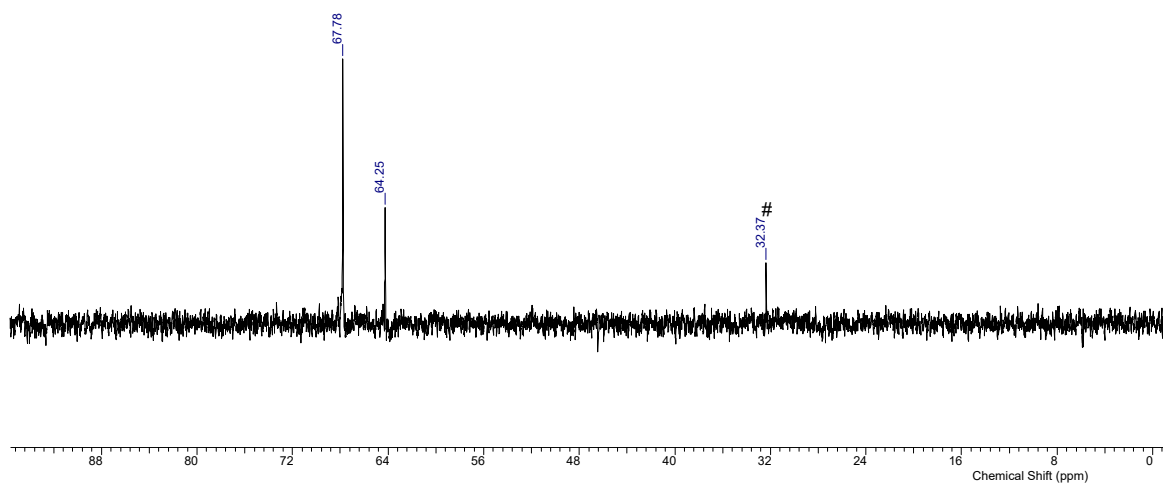

Figure 35:  $^{31}\text{P}$  NMR spectrum of  $[\text{Ru}(\text{bimca}^{\text{C}5\text{H}8})\text{Br}(\text{PPh}_3)]$  (5) in  $\text{CD}_3\text{OD}$ ; triphenylphosphine oxide (#).

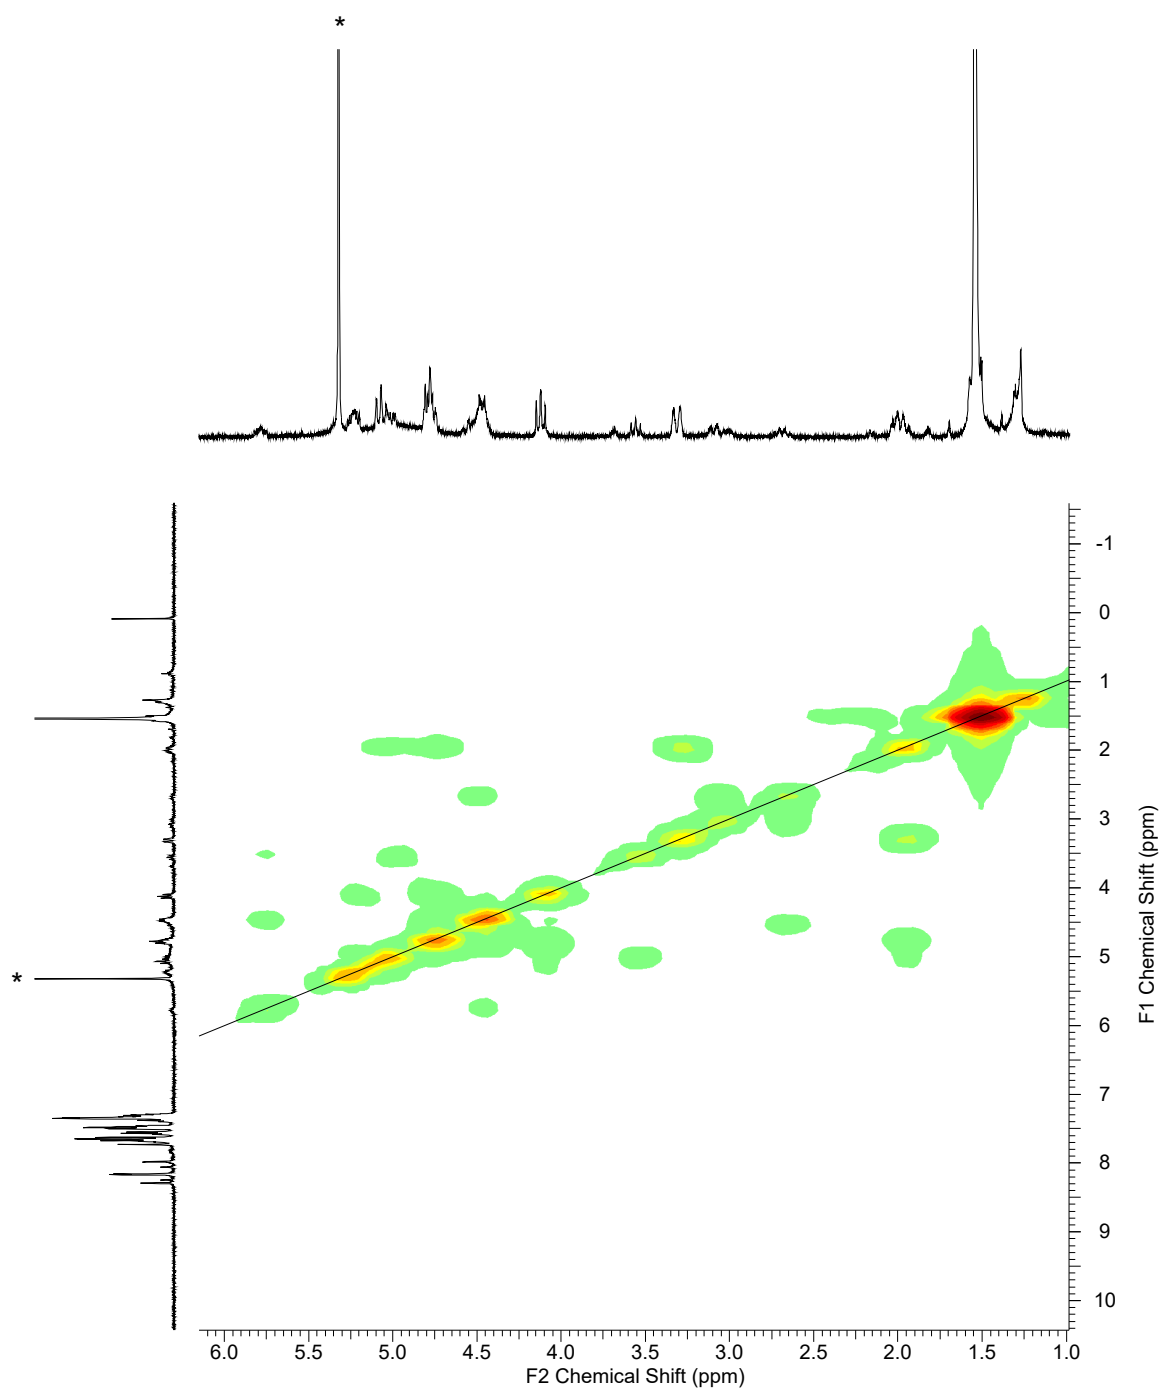

Figure 36:  $^1\text{H}$ ,  $^1\text{H}$  COSY NMR spectrum (detail) ( $\text{DCM-d}_2$  (\*)) of  $[\text{Ru}(\text{bimca}^{\text{C}5\text{H}8})\text{Br}(\text{PPh}_3)]$  (5).

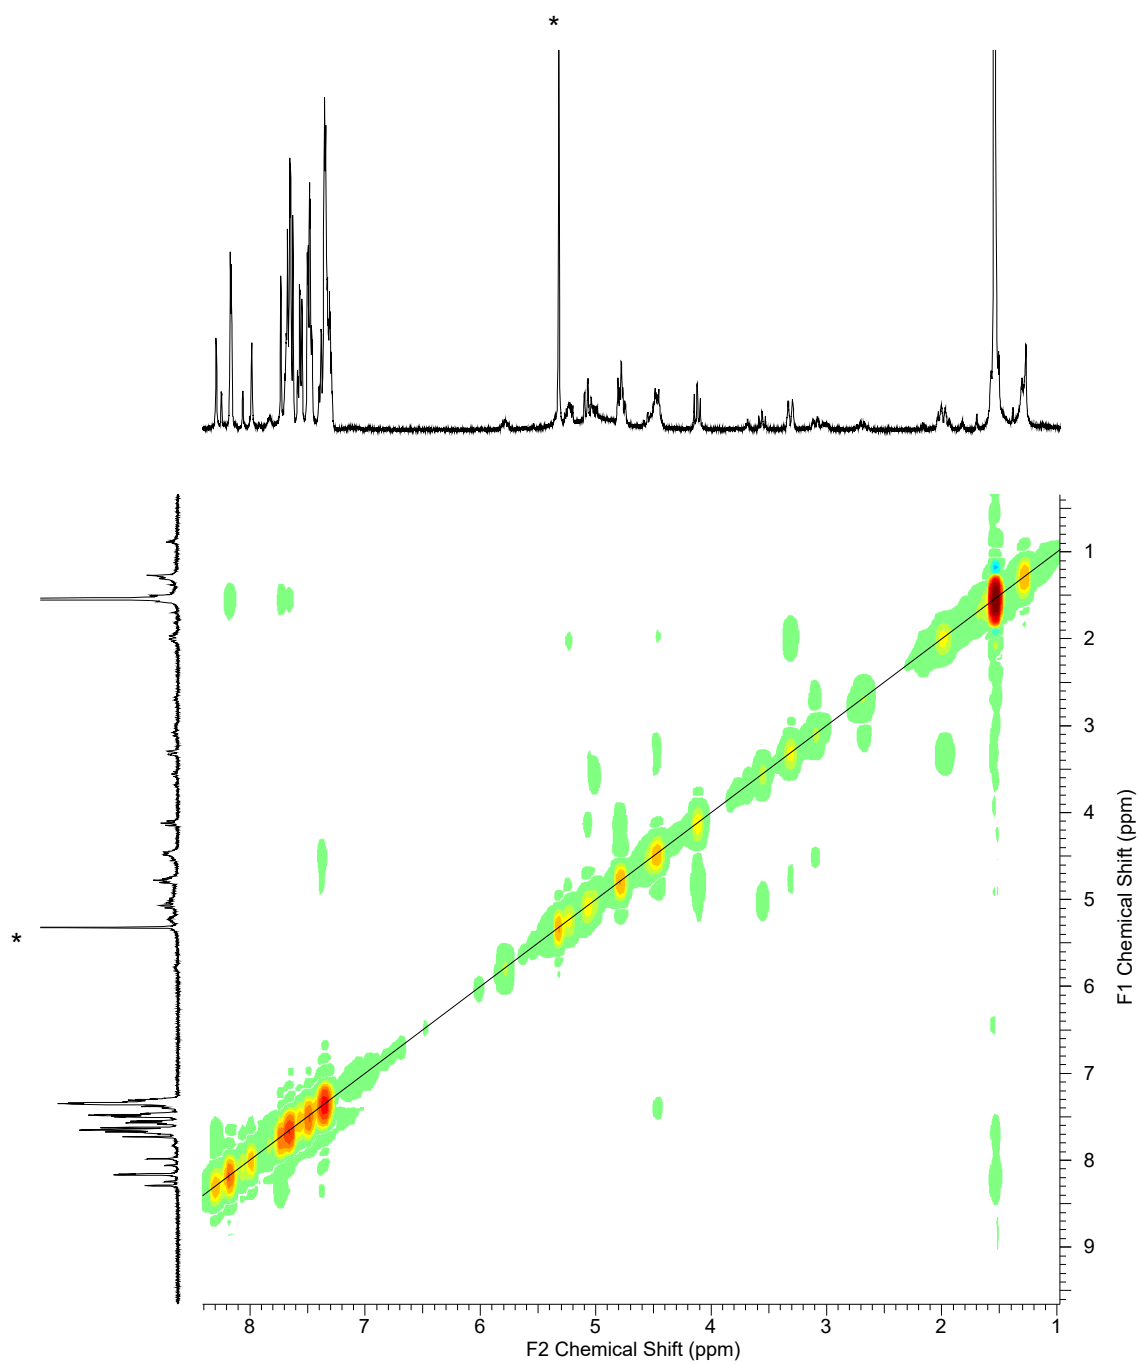

Figure 37:  $^1\text{H}$ ,  $^1\text{H}$  NOESY NMR spectrum (detail) ( $\text{DCM-d}_2$  (\*)) of  $[\text{Ru}(\text{bimca}^{\text{C5H8}})\text{Br}(\text{PPh}_3)]$  (5).

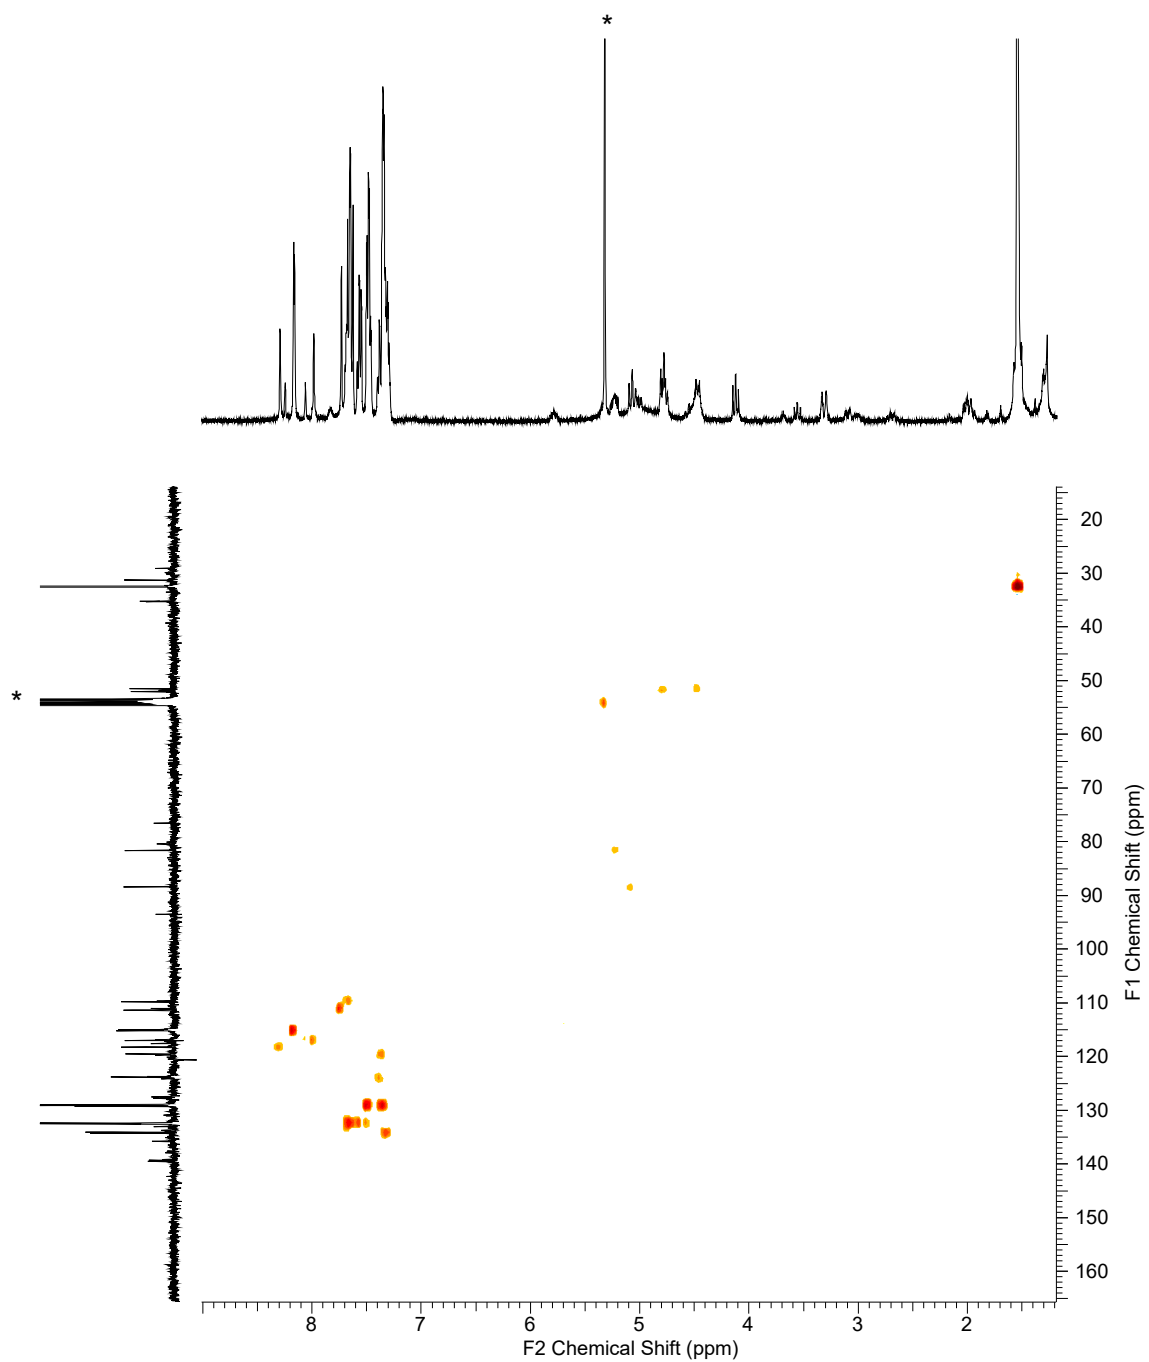

Figure 38:  $^1\text{H}$ ,  $^{13}\text{C}$  HSQC NMR spectrum (detail) (DCM- $d_2$  (\*)) of  $[\text{Ru}(\text{bimca}^{C5H8})\text{Br}(\text{PPh}_3)]$  (**5**).

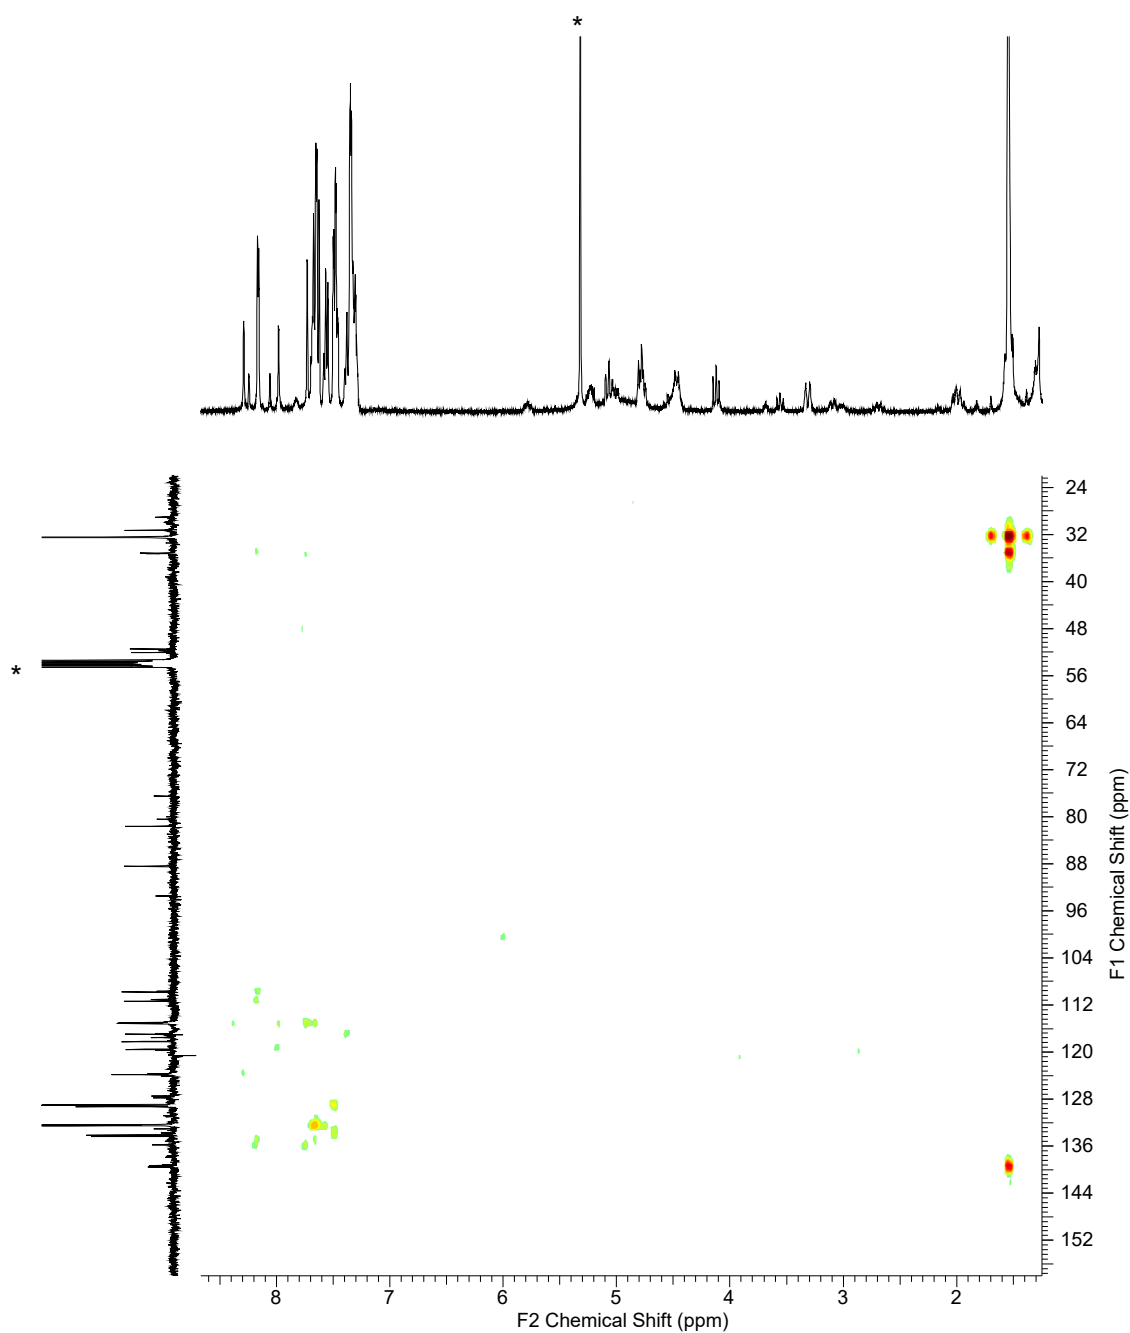

Figure 39:  $^1\text{H}$ ,  $^{13}\text{C}$  HMBC NMR spectrum (detail) ( $\text{DCM-d}_2$  (\*)) of  $[\text{Ru}(\text{bimca}^{\text{C5H8}})\text{Br}(\text{PPh}_3)]$  (5).

**[Pd(bimca<sup>C5H9</sup>)] (6):**

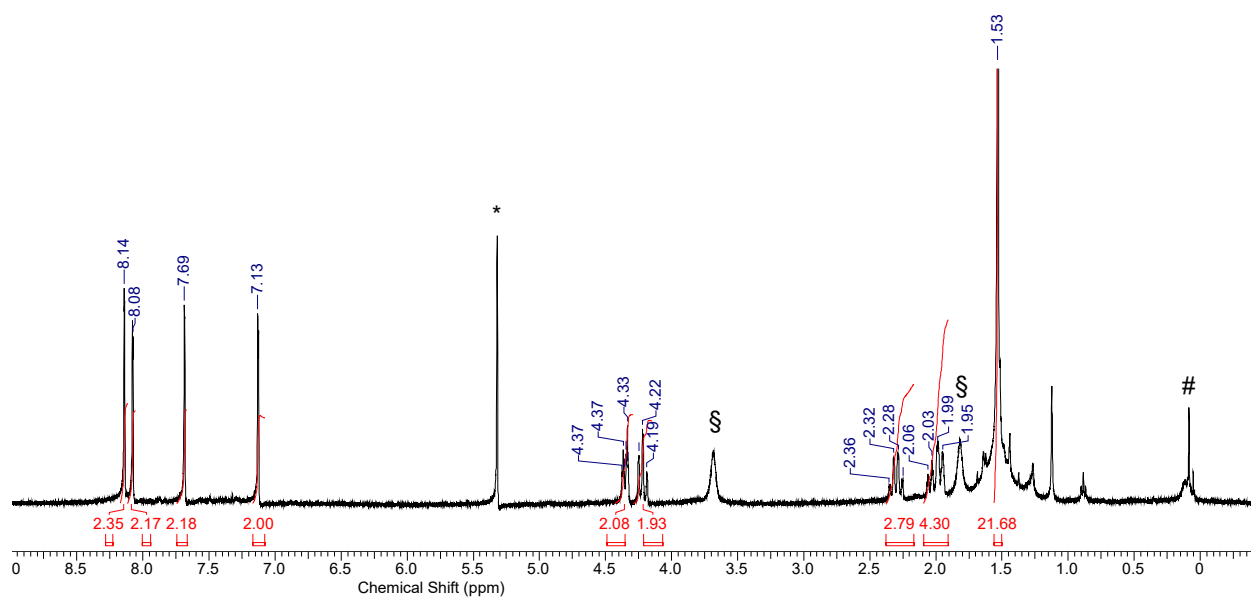

Figure 40: <sup>1</sup>H NMR spectrum (400 MHz, DCM-d<sub>2</sub> (\*)) of [Pd(bimca<sup>C5H9</sup>)] (6); grease (#), THF-d<sub>8</sub> (§).

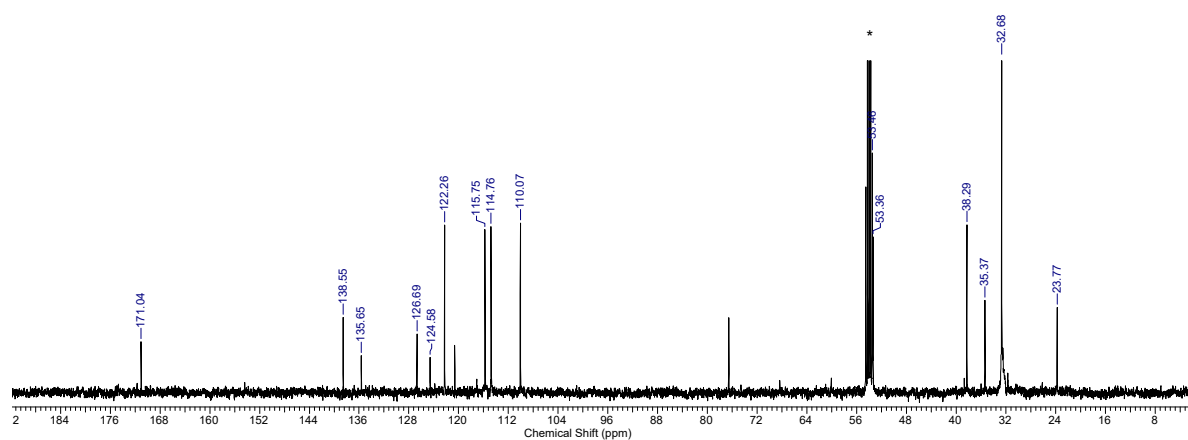

Figure 41: <sup>13</sup>C NMR spectrum (100 MHz, DCM-d<sub>2</sub> (\*)) of [Pd(bimca<sup>C5H9</sup>)] (6).



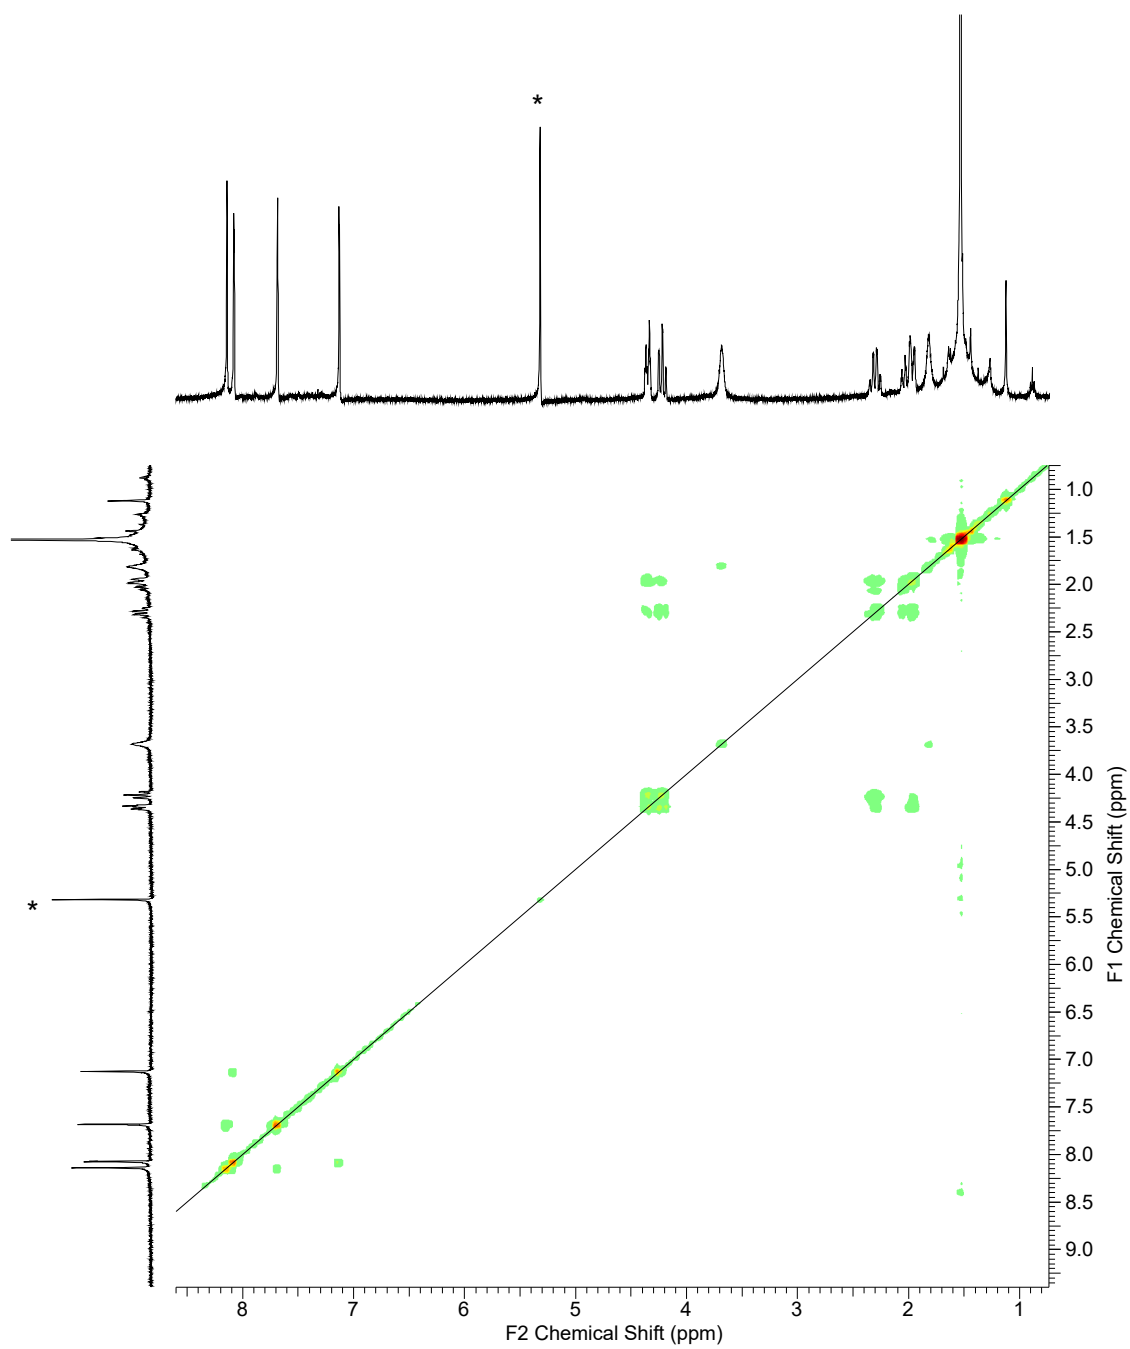

Figure 42:  $^1\text{H}$ ,  $^1\text{H}$  COSY NMR spectrum (detail) (400 MHz,  $\text{DCM-d}_2$  (\*)) of  $[\text{Pd}(\text{bimca}^{\text{C5H9}})]$  (**6**).

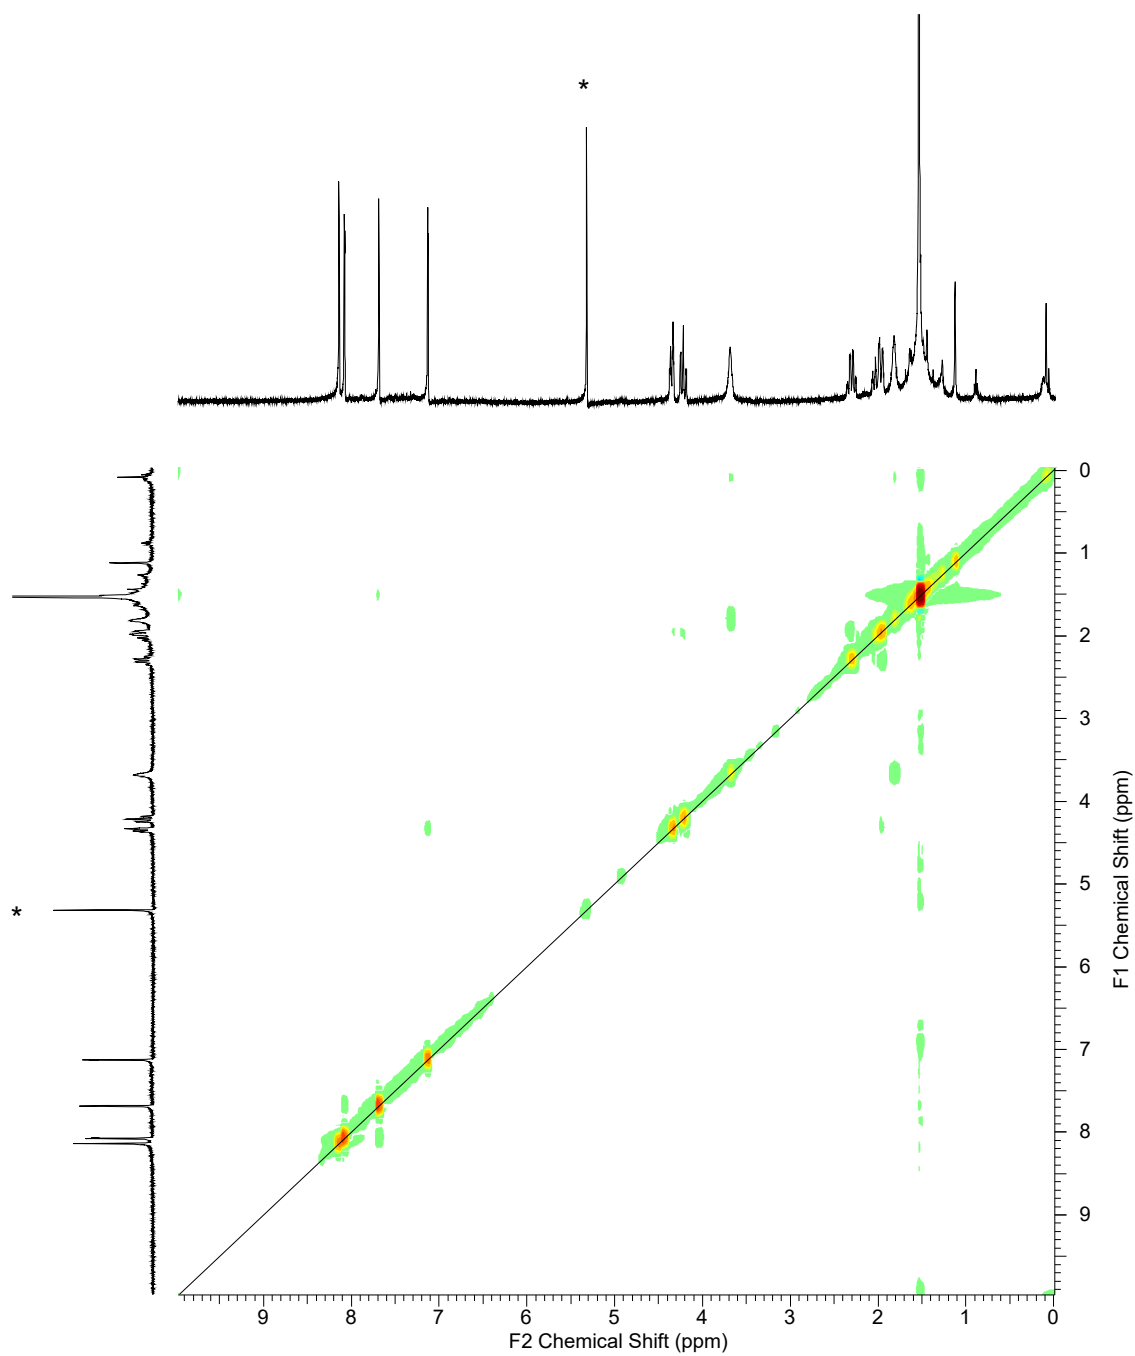

Figure 43:  $^1\text{H}$ ,  $^1\text{H}$  NOESY NMR spectrum (detail) (400 MHz,  $\text{DCM-d}_2$  (\*)) of  $[\text{Pd}(\text{bimca}^{\text{C5H9}})]$  (6).

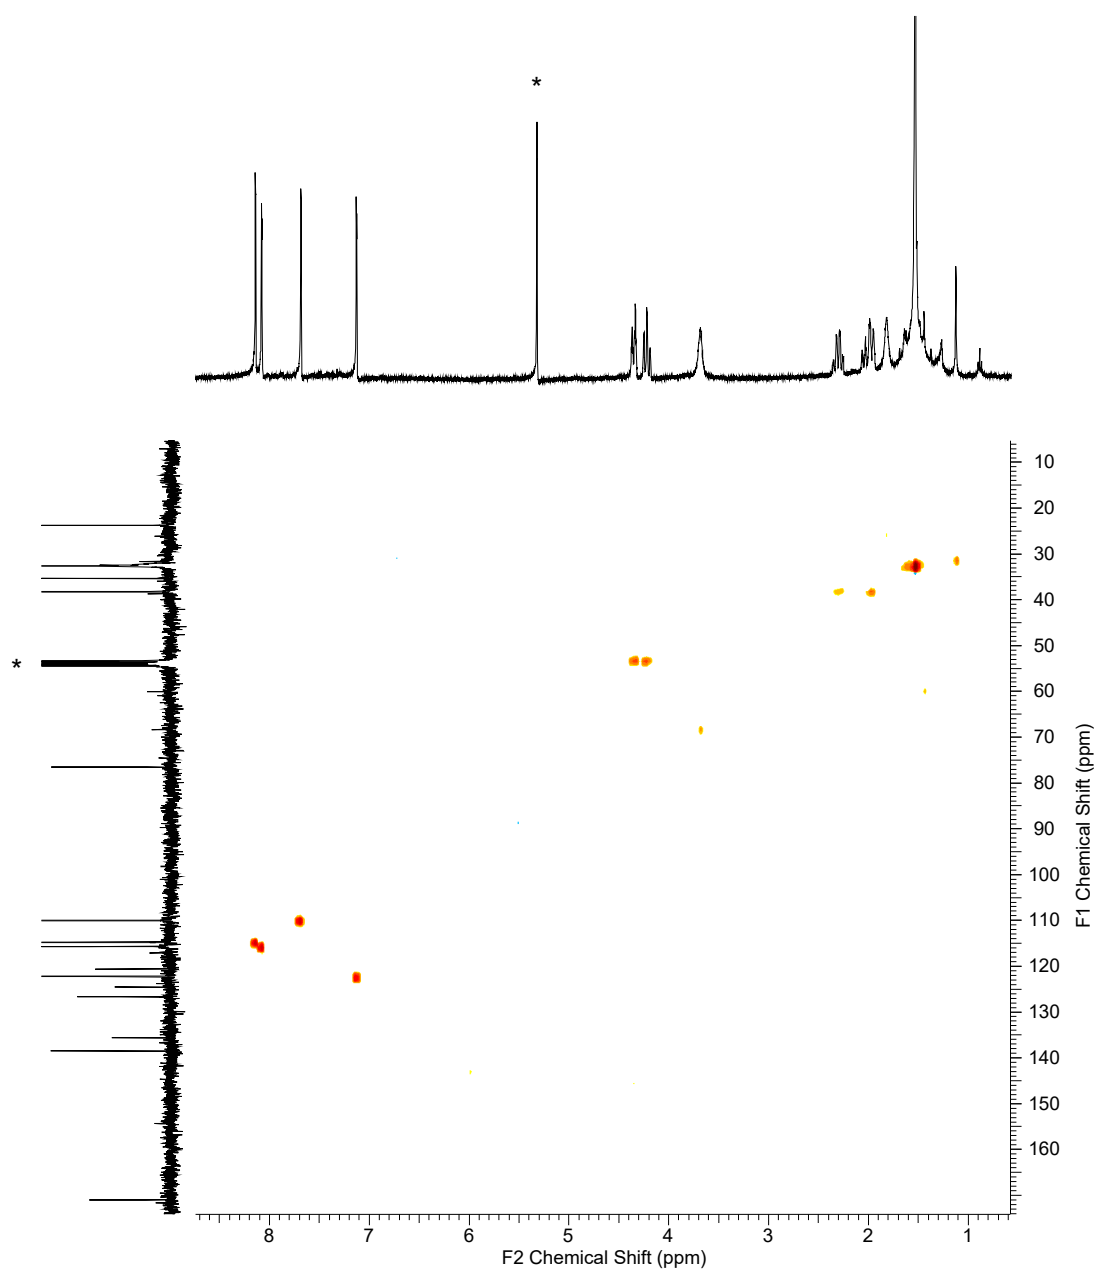

Figure 44:  $^1\text{H}/^{13}\text{C}$  HSQC NMR spectrum (detail) of  $[\text{Pd}(\text{bimca}^{\text{C}5\text{H}9})]$  in  $\text{DCM-d}_2$  (\*).

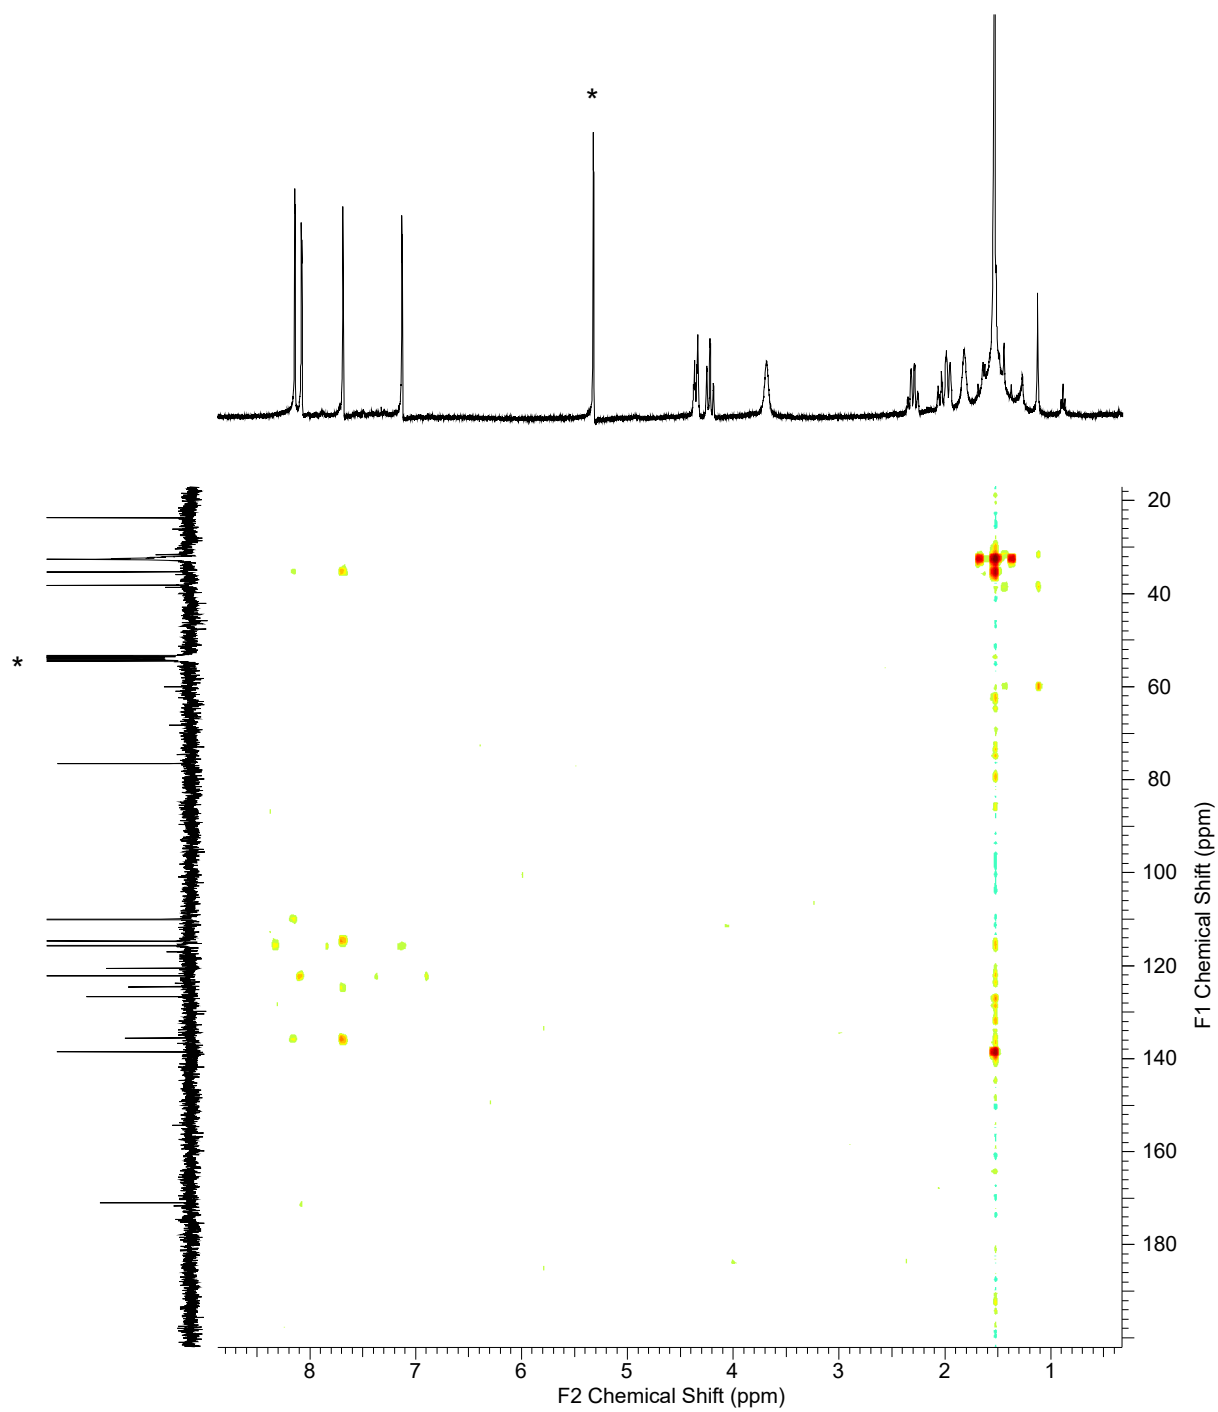

Figure 45:  $^1\text{H}$  $^{13}\text{C}$  HMBC NMR spectrum (detail) of  $[\text{Pd}(\text{bimca}^{\text{C}5\text{H}9})]$  (**6**) in  $\text{DCM-d}_2$  (\*).

## 2 HR-MS Spectrum of (6)

### [Pd(bimca<sup>C5H9</sup>)]:

MS (HR-ESI<sup>+</sup>, CH<sub>3</sub>CN) calculated [M+H]<sup>+</sup> = 584.20001; measured = 584.19985 relative mass deviation = 2.27 ppm.

The experimentally obtained peak (top) is a superposition of the peaks [M]<sup>+</sup> and [M+H]<sup>+</sup> as revealed by the simulated spectra of [M+H]<sup>+</sup> (middle) and [M]<sup>+</sup> (bottom).

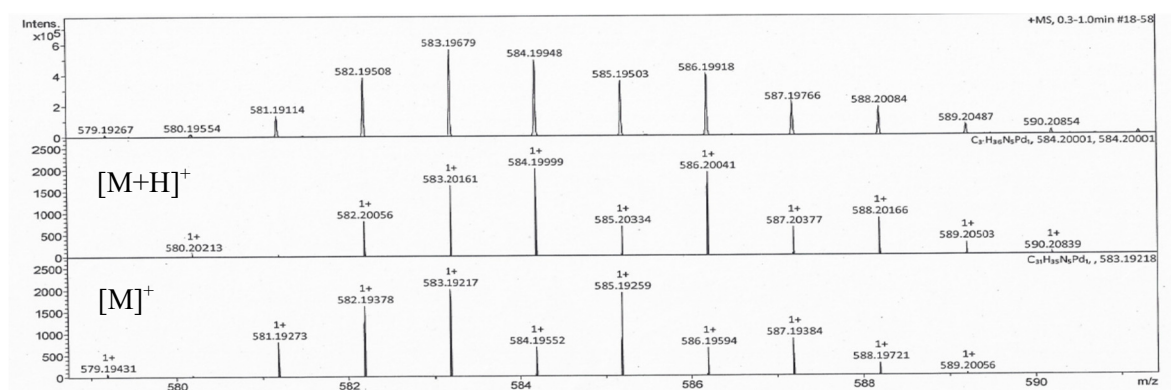

Figure 46: HR-ESI<sup>+</sup> analysis of [Pd(bimca<sup>C5H9</sup>)] experimental (top) and simulation of the peaks [M+H]<sup>+</sup> and [M]<sup>+</sup>.

### 3 Crystal structure analysis

| Compound                                   | [Li(bimca <sup>C5</sup> )] (2)                                     | [K(bimca <sup>C5</sup> )] (3)                                                  | [Ru(bimca <sup>C5</sup> )Cp*] (4)                                | [Ru(bimca <sup>C5H8</sup> )Br(PP<br>h <sub>3</sub> )] (5)            |
|--------------------------------------------|--------------------------------------------------------------------|--------------------------------------------------------------------------------|------------------------------------------------------------------|----------------------------------------------------------------------|
| CCDC No.#                                  | 2064679                                                            | 2064676                                                                        | 2064677                                                          | 2064678                                                              |
| Empirical formula                          | C <sub>558</sub> H <sub>648</sub> Li <sub>18</sub> N <sub>90</sub> | C <sub>86</sub> H <sub>120</sub> K <sub>2</sub> N <sub>10</sub> O <sub>6</sub> | C <sub>82</sub> H <sub>102</sub> N <sub>10</sub> Ru <sub>2</sub> | C <sub>51</sub> H <sub>53</sub> BrCl <sub>4</sub> N <sub>5</sub> PRu |
| Formular weight                            | 8740.54                                                            | 1468.11                                                                        | 1429.88                                                          | 1089.73                                                              |
| Temperature/K                              | 100(2)                                                             | 100(2)                                                                         | 100(2)                                                           | 100(2)                                                               |
| Radiation                                  | MoK <sub>α</sub> (λ = 0.71073)                                     | MoK <sub>α</sub> (λ = 0.71073)                                                 | MoK <sub>α</sub> (λ = 0.71073)                                   | MoK <sub>α</sub> (λ = 0.71073)                                       |
| Crystal system                             | trigonal                                                           | monoclinic                                                                     | tetragonal                                                       | monoclinic                                                           |
| Space group                                | R-3                                                                | P2 <sub>1</sub>                                                                | I4/m                                                             | P2 <sub>1</sub> /c                                                   |
| a/Å                                        | 20.4638(5)                                                         | 12.880(7)                                                                      | 19.800(4)                                                        | 13.541(2)                                                            |
| b/Å                                        | 20.4638(5)                                                         | 11.116(6)                                                                      | 19.800(4)                                                        | 14.552(2)                                                            |
| c/Å                                        | 37.4037(10)                                                        | 14.198(7)                                                                      | 22.655(4)                                                        | 25.683(4)                                                            |
| α/°                                        | 90                                                                 | 90                                                                             | 90                                                               | 90                                                                   |
| β/°                                        | 90                                                                 | 95.465(10)                                                                     | 90                                                               | 93.946(4)                                                            |
| γ/°                                        | 120                                                                | 90                                                                             | 90                                                               | 90                                                                   |
| Volume/Å <sup>3</sup>                      | 13564.9(8)                                                         | 2023.6(18)                                                                     | 8882(4)                                                          | 5048.8(13)                                                           |
| Z                                          | 1                                                                  | 1                                                                              | 4                                                                | 4                                                                    |
| ρ <sub>calc</sub> g/cm <sup>3</sup>        | 1.070                                                              | 1.205                                                                          | 1.069                                                            | 1.434                                                                |
| μ/mm <sup>-1</sup>                         | 0.064                                                              | 0.176                                                                          | 0.382                                                            | 1.385                                                                |
| Crystal size/mm <sup>3</sup>               | 0.231 x 0.248 x 0.568                                              | 0.082 x 0.135 x 1.454                                                          | 0.091 x 0.171 x 0.177                                            | 0.128 x 0.143 x 0.144                                                |
| F(000)                                     | 4680                                                               |                                                                                | 3008                                                             | 2224                                                                 |
| Completeness                               | 99.9 %                                                             | 99.5 %                                                                         | 99.8 %                                                           | 99.3 %                                                               |
| Description/colour                         | plate/colorless                                                    | column/colorless                                                               | plate/red                                                        | plate/red                                                            |
| Θ range for data collection/°              | 2.4625 – 28.17.                                                    | 2.4235 – 21.595.                                                               | 2.3115 – 20.4                                                    | 1.6205 – 18.61                                                       |
| Index ranges                               | -27≤h≤27, -27≤k≤27, -<br>49≤l≤49                                   |                                                                                | -24≤h≤24, -24≤k≤24, -<br>28≤l≤28                                 | -16≤h≤16, -18≤k≤18, -<br>32≤l≤32                                     |
| Reflections collected                      | 81891                                                              |                                                                                | 45658                                                            | 64973                                                                |
| Independent reflections                    | 9840 (R <sub>int</sub> = 0.0407,<br>R <sub>sigma</sub> = 0.0188)   |                                                                                | 4667 (R <sub>int</sub> = 0.1665,<br>R <sub>sigma</sub> = 0.0778) | 10325 (R <sub>int</sub> = 0.1296,<br>R <sub>sigma</sub> = 0.0904)    |
| Data/restraints/parameters                 | 9840/0/353                                                         |                                                                                | 4667/670/367                                                     | 10325/60/614                                                         |
| Goodness-of-fit on F <sup>2</sup>          | 1.036                                                              |                                                                                | 1.028                                                            | 1.041                                                                |
| Final R indexes                            | R <sub>1</sub> = 0.0526, wR <sub>2</sub> =                         |                                                                                | R <sub>1</sub> = 0.0462, wR <sub>2</sub> =                       | R <sub>1</sub> = 0.0645.                                             |
| R values [I>2σ(I)]                         | 0.1436                                                             |                                                                                | 0.1058                                                           | wR <sub>2</sub> = 0.1375                                             |
| Final R indeces [all data]                 | R <sub>1</sub> = 0.0665, wR <sub>2</sub> =<br>0.1570               |                                                                                | R <sub>1</sub> = 0.0815,<br>wR <sub>2</sub> = 0.1200             | R <sub>1</sub> = 0.1119,<br>wR <sub>2</sub> = 0.1592                 |
| Largest diff. peak/hole/ e Å <sup>-3</sup> | 0.69/-0.41                                                         |                                                                                | 0.44/-0.57                                                       | 1.37/-0.96                                                           |

## 4 UV-Vis and Fluorescence Spectroscopy

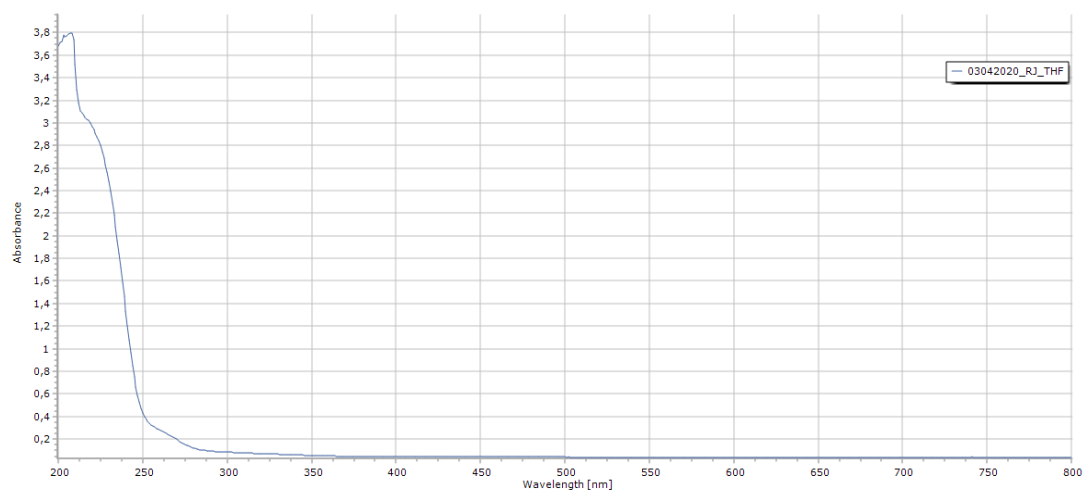

Figure 47: Absorption spectrum of THF (background)

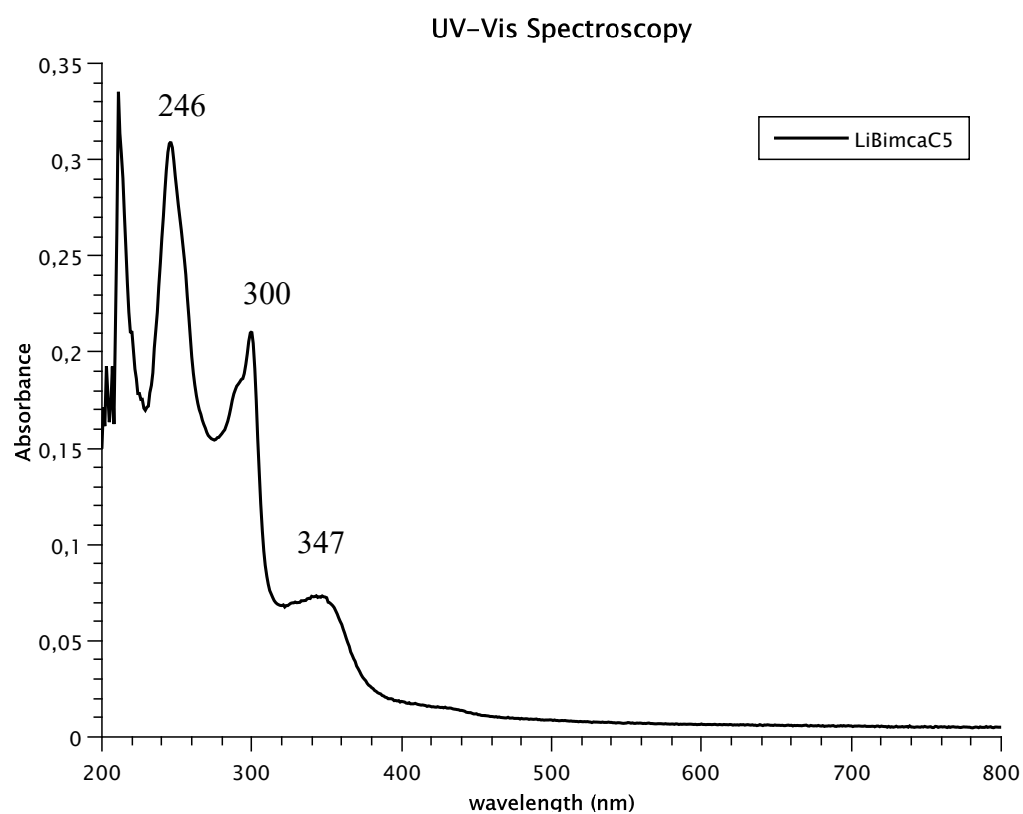

Figure 48: UV-Vis spectrum of  $[Li(bimca^{C5})]$  (2) (Tetrahydrofuran,  $c = 4 \times 10^{-5}$  M).

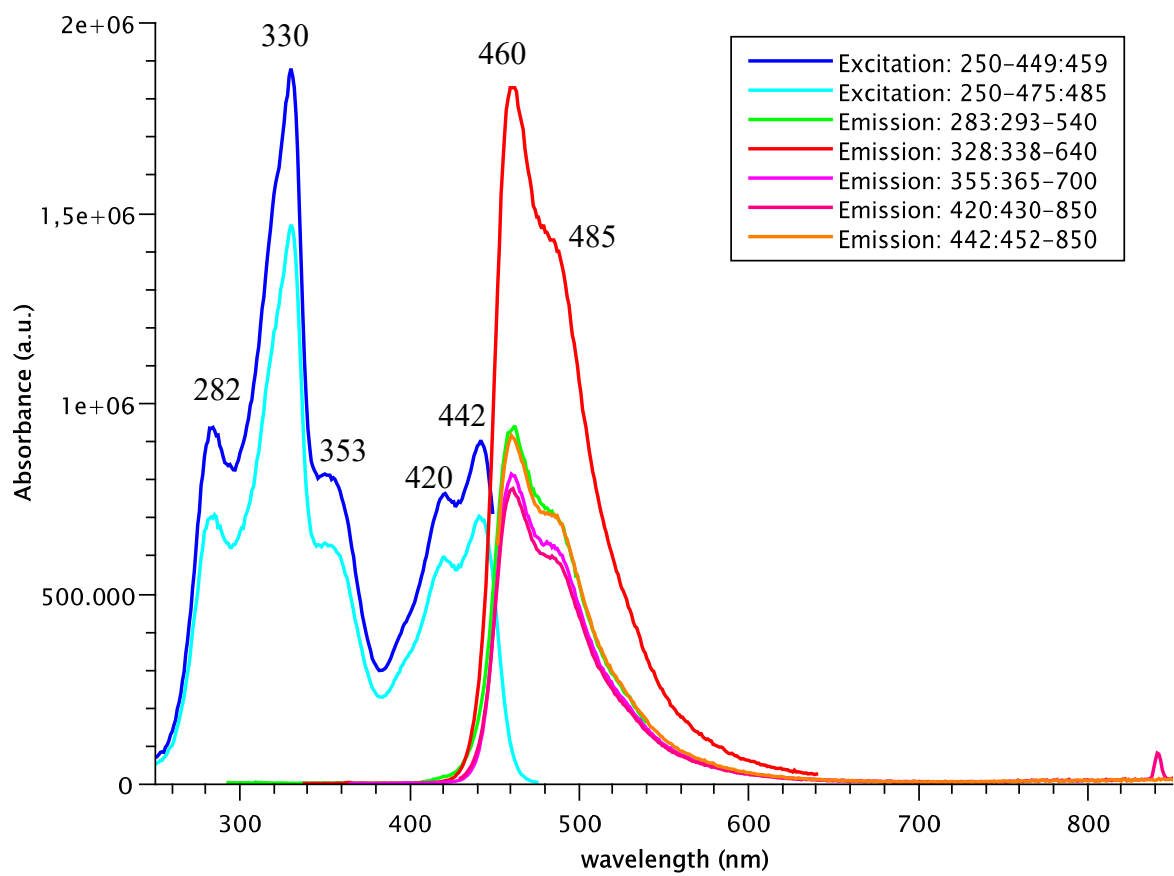

Figure 49: Excitation and emission spectra of  $[Li(bimca^{C5})]$  (2) in solution. (Tetrahydrofuran,  $c = 4 \times 10^{-3} M$ ).
